# Supplementary material for: Randomised feasibility trial of the helping families programme-modified: an intensive parenting intervention for parents affected by severe personality difficulties
Source: PubMed Central journal article supplement (PMC7045220; doi:10.1136/bmjopen-2019-033637), 2020-02-06
Supplement: bmjopen-2019-033637.draft_revisions.pdf [file bmjopen-2019-033637.draft_revisions.pdf]

# BMJ Open

BMJ Open is committed to open peer review. As part of this commitment we make the peer review history of every article we publish publicly available.

When an article is published we post the peer reviewers' comments and the authors' responses online. We also post the versions of the paper that were used during peer review. These are the versions that the peer review comments apply to.

The versions of the paper that follow are the versions that were submitted during the peer review process. They are not the versions of record or the final published versions. They should not be cited or distributed as the published version of this manuscript.

BMJ Open is an open access journal and the full, final, typeset and author-corrected version of record of the manuscript is available on our site with no access controls, subscription charges or pay-per-view fees (<http://bmjopen.bmj.com>).

If you have any questions on BMJ Open's open peer review process please email [info.bmjopen@bmj.com](mailto:info.bmjopen@bmj.com)

# BMJ Open

## Randomised Feasibility Trial of the Helping Families Programme-Modified: An Intensive Parenting Intervention for Parents Affected by Severe Personality Difficulties

|                               |                                                                                                                                                                                                                                                                                                                                                                                                                                                                                                                                                                                                                                                                                                                                                                                                                                                                                                                                                         |
|-------------------------------|---------------------------------------------------------------------------------------------------------------------------------------------------------------------------------------------------------------------------------------------------------------------------------------------------------------------------------------------------------------------------------------------------------------------------------------------------------------------------------------------------------------------------------------------------------------------------------------------------------------------------------------------------------------------------------------------------------------------------------------------------------------------------------------------------------------------------------------------------------------------------------------------------------------------------------------------------------|
| Journal:                      | <i>BMJ Open</i>                                                                                                                                                                                                                                                                                                                                                                                                                                                                                                                                                                                                                                                                                                                                                                                                                                                                                                                                         |
| Manuscript ID                 | bmjopen-2019-033637                                                                                                                                                                                                                                                                                                                                                                                                                                                                                                                                                                                                                                                                                                                                                                                                                                                                                                                                     |
| Article Type:                 | Original research                                                                                                                                                                                                                                                                                                                                                                                                                                                                                                                                                                                                                                                                                                                                                                                                                                                                                                                                       |
| Date Submitted by the Author: | 20-Aug-2019                                                                                                                                                                                                                                                                                                                                                                                                                                                                                                                                                                                                                                                                                                                                                                                                                                                                                                                                             |
| Complete List of Authors:     | Day, Crispin; King's College London, ; South London and Maudsley NHS Foundation Trust,<br>Briskman, Jackie; King's College London<br>Crawford, Mike; Imperial College London, Centre for Psychiatry<br>Foote, Lisa; McPin Foundation<br>Harris, Lucy; South London and Maudsley NHS Foundation Trust,<br>Boadu, Janet; King's College London<br>McCrone, Paul; King's College London,<br>McMurrin, Mary; University of Nottingham<br>Michelson, Daniel ; University of Sussex, School of Psychology<br>Moran, Paul; University of Bristol, Centre of Academic Mental Health,<br>School of Social and Community Medicine; University of Bristol<br>Mosse, Liberty; King's College London<br>Scott, Stephen; King's College London<br>Stahl, Daniel; Department of Biostatistics Institute of Psychiatry,<br>Psychology & Neuroscience (IoPPN), King's College London<br>Ramchandani, Paul; University of Cambridge<br>Weaver, Tim ; Middlesex University |
| Keywords:                     | Personality disorders < PSYCHIATRY, Parenting, Child behaviour, MENTAL HEALTH                                                                                                                                                                                                                                                                                                                                                                                                                                                                                                                                                                                                                                                                                                                                                                                                                                                                           |
|                               |                                                                                                                                                                                                                                                                                                                                                                                                                                                                                                                                                                                                                                                                                                                                                                                                                                                                                                                                                         |

SCHOLARONE™  
Manuscripts

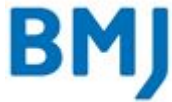

I, the Submitting Author has the right to grant and does grant on behalf of all authors of the Work (as defined in the below author licence), an exclusive licence and/or a non-exclusive licence for contributions from authors who are: i) UK Crown employees; ii) where BMJ has agreed a CC-BY licence shall apply, and/or iii) in accordance with the terms applicable for US Federal Government officers or employees acting as part of their official duties; on a worldwide, perpetual, irrevocable, royalty-free basis to BMJ Publishing Group Ltd ("BMJ") its licensees and where the relevant Journal is co-owned by BMJ to the co-owners of the Journal, to publish the Work in this journal and any other BMJ products and to exploit all rights, as set out in our [licence](#).

The Submitting Author accepts and understands that any supply made under these terms is made by BMJ to the Submitting Author unless you are acting as an employee on behalf of your employer or a postgraduate student of an affiliated institution which is paying any applicable article publishing charge ("APC") for Open Access articles. Where the Submitting Author wishes to make the Work available on an Open Access basis (and intends to pay the relevant APC), the terms of reuse of such Open Access shall be governed by a Creative Commons licence – details of these licences and which [Creative Commons](#) licence will apply to this Work are set out in our licence referred to above.

Other than as permitted in any relevant BMJ Author's Self Archiving Policies, I confirm this Work has not been accepted for publication elsewhere, is not being considered for publication elsewhere and does not duplicate material already published. I confirm all authors consent to publication of this Work and authorise the granting of this licence.

# Randomised Feasibility Trial of the Helping Families Programme-Modified: An Intensive Parenting Intervention for Parents Affected by Severe Personality Difficulties

Crispin Day<sup>\*a</sup>, Jackie Briskman<sup>b</sup>, Mike J Crawford<sup>c</sup>, Lisa Foote<sup>d</sup>, Lucy Harris<sup>a</sup>, Janet Boadu<sup>e</sup>, Paul McCrone<sup>e</sup>, Mary McMurrin<sup>f</sup>, Daniel Michelson<sup>g</sup>, Paul Moran<sup>h</sup>, Liberty Mosse<sup>a</sup>, Stephen Scott<sup>i</sup>, Daniel Stahl<sup>j</sup>, Paul Ramchandani<sup>k</sup>, & Timothy Weaver<sup>l</sup>.

\*Corresponding author

<sup>a</sup> CAMHS Research Unit, Centre for Parent and Child Support, South London and Maudsley NHS Foundation Trust, Michael Rutter Centre, De Crespigny Park, London SE5 8AF, UK. Email: [crispin.1.day@kcl.ac.uk](mailto:crispin.1.day@kcl.ac.uk)

<sup>b</sup> Dept. of Psychology, Institute of Psychiatry, Psychology and Neuroscience, King's College London, De Crespigny Park, London SE5 8AF, UK.

<sup>c</sup> The Centre for Psychiatry, Imperial College London, 7th Floor Commonwealth Building, Hammersmith Hospital Campus, London W12 0NN, UK.

<sup>d</sup> McPin Foundation, 32-36 Loman St, London SE1 0EH, UK.

<sup>e</sup> King's Health Economics, P024 David Goldberg Centre, Institute of Psychiatry, Psychology & Neuroscience, King's College London, De Crespigny Park, London SE5 8AF, UK.

<sup>f</sup> Institute of Mental Health, University of Nottingham, Triumph Road, Nottingham, NG7 2TU, UK.

<sup>g</sup> School of Psychology, University of Sussex, Falmer, Brighton BN1 9QH

<sup>h</sup> Centre for Academic Mental Health, Department of Population Health Sciences, Bristol Medical School, University of Bristol, Bristol BS8 2BN, UK.

<sup>i</sup> Department of Child and Adolescent Psychiatry, Institute of Psychiatry, Psychology and Neuroscience, King's College London, De Crespigny Park, London SE5 8AF, UK.

<sup>j</sup> Department of Biostatistics, Institute of Psychiatry, Psychology and Neuroscience, King's College London, De Crespigny Park, London SE5 8AF, UK.

<sup>k</sup> PEDAL Research Centre, Faculty of Education, University of Cambridge, UK.

<sup>l</sup> Department of Mental Health, Social Work and Integrative Medicine, School of Health and Education, Middlesex University, The Burroughs, London NW4 4BT, UK.

# Randomised Feasibility Trial of the Helping Families Programme-Modified: An Intensive Parenting Intervention for Parents Affected by Severe Personality Difficulties

## Abstract

### Background

Specialist parenting intervention could improve coexistent mental health problems of parents affected by severe personality difficulties and their children.

### Objective

Conduct a feasibility trial of Helping Families Programme-Modified (HFP-M), a specialist parenting intervention.

### Design

Pragmatic, mixed-methods trial, 1:1 random allocation, assessing feasibility, intervention acceptability and outcome estimates.

### Settings

Two UK NHS health trusts and concomitant local authority children's social care services

### Participants

Parents: (i) primary caregiver; (ii) 18-65 years; (iii) severe personality difficulties, (iv) proficient English, and (v) capacity for consent. Child: (i) aged 3-11 years; (ii) living with index parent, (iii) significant emotional/behavioural difficulties.

### Intervention

HFP-M: specialist 16-session home-based intervention using structured, goal-orientated parenting and therapeutic engagement strategies. Usual care: standard care augmented by a single psychoeducational parenting session.

### Outcomes

Feasibility parameters: rates of recruitment, eligibility, allocation, retention, data completion and experience. Intervention acceptability: rates of acceptance, completion, and alliance

1  
2  
3 (Working Alliance Inventory-Short Revised). Outcomes: child (Eyberg Child Behavior  
4 Inventory, Concerns About My Child, Child Behavior Checklist-Internalising Scale),  
5 parenting (Arnold-O’Leary Parenting Scale, Kansas Parental Satisfaction Scale, and parent  
6 mental health (Symptom Checklist-27. Researchers collecting quantitative data were blind to  
7 allocation status.  
8  
9  
10

## 11 12 **Results**

13  
14  
15 Findings broadly supported trial feasibility using non-diagnostic selection criterion. Of 48  
16 participants recruited, 32 completed post intervention measures at mean 42 weeks later. Post-  
17 intervention retention exceeded *a priori* rate (HFP-M=18; Usual care=14; 66.7%, 95% C.I.  
18 51.6%-79.6%;). HFP-M was acceptable, with delivery longer than planned. Usual care  
19 condition had lower alliance rating. Child and parenting outcome effects detected across trial  
20 arms with potential HFP-M advantage (ES range: 0.0-1.3).  
21  
22  
23  
24  
25

## 26 27 **Conclusion**

28  
29 HFP-M is an acceptable and potentially effective specialist parenting. A definitive trial is  
30 feasible, subject to consideration of recruitment and retention methods, intervention  
31 efficiency and comparator condition. Caution is required in interpretation of results due to  
32 reduced sample size. No serious adverse events reported.  
33  
34  
35

## 36 37 **Trial registration**

38  
39  
40  
41  
42  
43  
44  
45  
46  
47  
48  
49  
50  
51  
52  
53  
54  
55  
56  
57  
58  
59  
60  
ISRCTN14573230

## Article Summary

### Strengths and Limitations of this Study

- This is the first feasibility trial of a specialist parenting intervention for coexistent mental health problems of parents affected by severe personality difficulties and their children.
- Findings support further research to test the specialist parenting intervention in a definitive trial, with modifications required to improve intervention efficiency and participant retention.
- Caution is required in interpretation of results due to reduced sample size.
- The trial population's complex personality difficulties underline the importance of effective and sensitive management of trial consent procedures, random allocation and ongoing engagement of participants, particularly for those allocated to the usual care condition.

### Keywords

Child behaviour, parenting, mental health, family relations

### Funding

This work was supported by National Institute of Health Research, Health Technology Assessment, Project Reference Number: 12/194/01.

## Contributions of the Authors

Dr Crispin Day, Head, Centre for Parent and Child Support, South London and Maudsley NHS Foundation Trust and Head, CAMHS Research Unit, King's College, London, was the chief investigator and responsible for the overall conception, design, data acquisition, analysis, interpretation of findings at each phase of this research. He is responsible for the overall content of this report.

Ms Jackie Briskman, Department of Psychology, King's College, London, was the senior research trial coordinator and was responsible for data acquisition, analysis, interpretation, drafting findings and revising this report.

Professor Mike J. Crawford, Professor in Mental Health Research, Centre for Psychiatry, Imperial College, London was a co-applicant and contributed to the overall conception, design and interpretation of findings at each phase of this research. He provided an expert contribution about personality disorder. He contributed to critically revising this report.

Ms Lisa Foote, McPin Foundation, was a service user researcher and representative in this research. She contributed to the design, data acquisition, analysis, interpretation and drafting of findings. She contributed to critically revising this report

Dr Lucy Harris, Deputy Head, Centre for Parent and Child Support, South London and Maudsley NHS Foundation Trust, was responsible for the development and revision of Helping Families Programme-Modified and supervised trial therapists. She contributed to critically revising this report.

Ms Janet Boadu is a researcher at King's Health Economics, King's College, London, co-conducted the health economic analysis and drafted findings for this report.

Professor Paul McCrone, Professor of Health Economics and Director of King's Health Economics, King's College, London, was a co-applicant and contributed to the overall conception, design and interpretation of findings at each phase of this research. He led the health economic component of the research and contributed to critically revising this report.

Professor Mary McMurrin, Professor at the Institute of Mental Health, University of Nottingham was a co-applicant and contributed to the overall conception, design and interpretation of findings at each phase of this research. She provided an expert contribution about personality disorder. She was a member of the Manualisation Working Group, contributed to research therapist training and contributed to critically revising this report.



1  
2  
3 Dr Daniel Michelson, Senior Lecturer in Clinical Psychology, School of Psychology,  
4 University of Sussex, was a co-applicant and worked closely with the chief investigator on  
5 the overall conception and design of this research. He was senior research coordinator during  
6 the intervention development phase leading up to this trial and contributed to critically  
7 revising this report.  
8  
9

10  
11  
12 Professor Paul Moran, Professor of Psychiatry, Population Health Sciences, University of  
13 Bristol, was a co-applicant and contributed to the overall conception, design and  
14 interpretation of findings at each phase of this research. He provided an expert contribution  
15 about personality disorder. He contributed to research therapist training and critically revised  
16 this report.  
17  
18  
19

20  
21  
22 Ms Liberty Mosse, CAMHS Research Unit, King's College, London, was a researcher  
23 worker on this study. She was responsible for Phase 3 data acquisition, analysis and  
24 interpretation of findings. She completed the majority of qualitative data acquisition and led  
25 its analysis under the direction of the chief investigator. She contributed to critically revising  
26 this report.  
27  
28  
29

30  
31 Professor Stephen Scott, Professor of Child Health and Behaviour, King's College, London,  
32 was a co-applicant and contributed to the overall conception, design and interpretation of  
33 findings at each phase of this research. He provided an expert contribution about parenting  
34 and parenting programmes. He contributed to critically revising this report.  
35  
36  
37

38  
39 Dr Daniel Stahl, Reader in Biostatistics, Biostatistics and Health Informatics, King's College,  
40 London, was a co-applicant and contributed to the overall conception, design and  
41 interpretation of findings at each phase of this research. He provided an expert contribution  
42 to the design, analysis and interpretation of quantitative components of the research. He  
43 contributed to critically revising this report.  
44  
45  
46  
47

48 Professor Paul Ramchandani, LEGO Professor of Play in Education, Development and  
49 Learning, Faculty of Education, University of Cambridge, was a co-applicant and contributed  
50 to the overall conception, design and interpretation of findings at each phase of this research.  
51 He provided an expert contribution about child mental health and co-ordinated the research in  
52 CNWL. He contributed to critically revising this report.  
53  
54  
55  
56

57 Dr Timothy Weaver, Associate Professor in Mental Health, Mental Health Social Work &  
58 Interprofessional Learning, Middlesex University, London, was a co-applicant and  
59  
60

1  
2  
3 contributed to the overall conception, design and interpretation of findings at each phase of  
4 this research. He provided an expert contribution about qualitative design, data acquisition  
5 and interpretation. He contributed to critically revising this report.  
6  
7

### 8 9 **Manual and Data Availability**

10 All manuals can be obtained from the corresponding author. All data requests should be  
11 submitted to the corresponding author for consideration. Access to anonymised data may be  
12 granted following review.  
13  
14  
15

### 16 17 **Acknowledgements**

18 We are indebted to the parents, practitioners, clinicians and service managers who worked  
19 with us on this trial, particularly Ruth Wilson. We would particularly like to thank Sarah  
20 Inkpen, Bethan Stevenson and Chelsea McCorry for their help with trial findings. Peter  
21 Fonagy and Philip Graham for overseeing the governance of the trial  
22  
23  
24  
25  
26  
27  
28  
29  
30  
31  
32  
33  
34  
35  
36  
37  
38  
39  
40  
41  
42  
43  
44  
45  
46  
47  
48  
49  
50  
51  
52  
53  
54  
55  
56  
57  
58  
59  
60

## Introduction

Mental ill health is the largest cause of disability, with three-quarters of lifetime disorders starting during childhood.[1] Children of parents affected by severe personality difficulties are at particular risk due to the impact of parents' symptoms and associated impairment on parenting capacity.[2-4] Lack of evidence-based treatments, under-developed care pathways and stigma result in poorer immediate and longer-term outcomes for children, increase likelihood of intergenerational transmission of mental health difficulties and perpetuate social disadvantage.[5,6]

Severe personality difficulties, including personality disorders, affect over 4% of UK adults and 40% of mental health service users, at least one-quarter of whom are parents. [7,8] Per annum UK treatment costs exceed £70 million with wider societal costs estimated at £8 billion per year. [9] Characterised by highly problematic interpersonal, family and social relationships, emotional dysregulation, and poor impulse control, severe parental personality difficulties are associated with insensitive and intrusive interactions with offspring, family hostility, inconsistent and unpredictable family routines that undermine affectionate, stable, and responsive parenting required for healthy child development.[2-4] Affected parents are likely to suffer higher levels of parenting stress and lower satisfaction, exacerbating their own mental health difficulties.[10,11]

One in ten UK children suffer mental health disorders, with children of parents with severe personality difficulties at substantially higher risk, up to 70%, of intergenerational transmission, most commonly behavioural disorders.[12,13] Mental health disorders during childhood are associated with academic failure, school exclusion, maltreatment, self-harm and gang affiliation, with longer term life-time risks of comorbid mental and physical health conditions, drug misuse, offending and worklessness.[1,12,13] Annual UK public service costs for severe behavioural problems are estimated at £5,000 per child including £1400 health costs. UK lifetime estimated costs per case range from £85,000 (moderate case) to £260,000 (severe case).[14,15]

The development and implementation of effective care models for co-occurring child and parental mental health problems are significant health policy and research priorities.[16-19] Nevertheless, routine care is highly variable and fragmented, generally focused on the needs of *either* the adult *or* the child,[17] resulting in problem under-identification, poor understanding of the interrelationship between child and parent difficulties, and

1  
2  
3 misattribution of parenting difficulties to adult mental health symptoms *per se*. [20] Affected  
4 parents can be reluctant to engage in interventions due to associated stigma, treatment  
5 scepticism, fears about child protection proceedings, and the interpersonal difficulties and  
6  
7 adverse life circumstances associated with personality difficulties. [21]  
8  
9

10 Parenting and parent factors are central to much effective child mental health treatment and  
11 problem remediation. Parenting programmes are the recommended cost-effective treatment  
12 for child behaviour problems. [22,23] However, non-specialised parenting programmes, not  
13 specifically designed for parents affected by mental health difficulties, often result in poorer  
14 engagement, acceptability and outcomes for this population. [24,25] Specialist parenting  
15 interventions for some parental mental health conditions, such as depression, substance  
16 misuse and eating disorders, have demonstrated improved outcomes and reductions in  
17 intergenerational transmission of mental illness, by up to 40%. [26,27] Specialist programmes  
18 for parents affected by personality difficulties are at an earlier stage of genesis and evidence  
19 production.  
20  
21  
22  
23  
24  
25  
26  
27  
28

29 The Helping Families Programme-Modified (HFP-M) was developed as a specialist,  
30 intensive parenting interventions to address this need and service gap. Its aim is to improve  
31 immediate child and parenting outcomes with longer-term potential to reduce  
32 intergenerational transmission and psychosocial adversity within affected families. [4] HFP-  
33 M development was guided by recommended frameworks, involving synthesis of two  
34 existing evidence-based interventions, integration of relevant clinical practice  
35 recommendations and service user consultation. [22,28-33] HFP-M's structured approach has  
36 three core components to achieve its aims [34]: (i) Core Therapeutic Process: including  
37 partnership and goal-based methods intended to promote collaborative engagement and  
38 shared formulation, empathic parent validation, and crisis management; [34] (ii) Parent  
39 Groundwork: including emotion-focussed, cognitive, behavioural and interpersonal strategies  
40 intended to mitigate the effects of parental emotional dysregulation and hostility on parenting  
41 and family function, and (iii) Parenting Strategies: including skills development and use of  
42 positive parenting methods, attitudes, emotional care and reflective function  
43  
44  
45  
46  
47  
48  
49  
50  
51  
52

53 Definitive trials require successful participant recruitment and retention, and intervention  
54 acceptability. [30, 35-39] Participant retention underpins trial validity, with lower rates  
55 reducing power, undermining interpretation of findings and increasing costs. HFP-M  
56 participant retention, and initial recruitment, was expected to be affected by: (i) participants'  
57  
58  
59  
60

1  
2  
3 core clinical features, (ii) their greater exposure to family stress, negative life events, lower  
4 levels of social support and co-morbid mental health conditions, and (iii) under-identification  
5 of need within routine care, negative referrer expectancies, lower service engagement and  
6 non-attendance within clinical services. The impact of these factors is reflected in evidence  
7 derived from 45 personality disorder treatments trials reported in two systematic reviews  
8 indicating a median participant non-completion rate of 35%.[40,41] Previous field testing  
9 had indicated that trial recruitment based on research diagnosis of personality disorder was  
10 unlikely to be viable.[21]

11  
12 To be useful and effective in practice, interventions need to demonstrate both clinical efficacy  
13 and user acceptability. Acceptability refers to service user judgements about an intervention  
14 across four inter-related domains of satisfaction: (i) intervention relevance, (ii) intervention  
15 content and procedures, (iii) clinician/provider characteristics and (iv) outcome suitability.  
16 [37,38]

17  
18 This study reports quantitative findings from a randomised feasibility trial of HFP-M, the  
19 protocol for which has been published [4]. The aim was to assess the feasibility of research  
20 procedures and intervention delivery with findings being used to inform the design of a full-  
21 scale trial. More specifically, the trial sought to obtain evidence for: (i) rates of participant  
22 identification, recruitment and retention, the primary *a priori* feasibility criterion was a  
23 retention rate of at least 65% post-intervention, (ii) intervention acceptability, content and  
24 fidelity, and (iii) effect sizes and variance estimates for child and parent outcomes necessary  
25 to power a full-scale trial, with child behaviour nominated as the primary clinical outcome in  
26 the feasibility trial. Qualitative findings from a parallel process evaluation investigating the  
27 influence of contextual factors on intervention implementation and outcome generation are  
28 published elsewhere, as are preliminary intervention costs and estimates of cost-  
29 effectiveness.[42]

## 30 31 32 33 34 35 36 37 38 39 40 41 42 43 44 45 46 47 48 49 **Method**

### 50 51 **Design**

52  
53 Mixed-method, two-arm, parallel feasibility trial with random allocation of consenting  
54 parents in a 1:1 ratio to either (i) HFP-M or (ii) Usual care.  
55  
56  
57  
58  
59  
60

Quantitative data were intended to be collected at pre-randomisation baseline (Time 1), post-intervention (Time 2), six months from baseline; and follow-up (Time 3), 4-month, ten months from baseline.

## Eligibility criteria

Parent: (i) primary parental caregiver for index child; (ii) aged 18-65 years; (iii) experiencing severe personality difficulties, assessed by self-administered Standardised Assessment of Personality - Abbreviated Scale (SAPAS) score of  $\geq 3$  [43], (iv) proficient written and spoken English, and (v) capacity to provide informed consent.

Child: (i) aged 3-11 years; (ii) living with index parent; (iii) experiencing significant emotional and/or behavioural difficulties, assessed by Strengths and Difficulties Questionnaire [44] Total Score of  $\geq 17$ .

Exclusion criteria: Parent (i) co-existing psychosis; (ii) engagement in another structured parenting intervention; (iii) mental health inpatient status or (iv) insufficient language/cognitive abilities; Child (i) pervasive developmental disorder; (ii) not residing with index parent; and (iii) considered for/subject to child protection proceedings/supervision.

## Interventions

### *HFP-M Intervention*

16 session home-based one-one parenting intervention for parents with severe personality difficulties, including personality disorder. Session modules proceeded iteratively to (i) establish an effective, validating collaborative partnership, (ii) explore and develop shared understanding of the impact of severe parental personality difficulties on parenting, child functioning and wider family ecology, (iv) implement parent quick wins and focal parenting and child intervention goals, (v) use of evidence-based parenting and parent self-care strategies to achieve change and agreed goals, and (vi) recurrent review of goal attainment and therapeutic partnership. Six trial therapists delivered HFP-M, receiving eight, three-hour, training sessions provided by HFP-M programme developers and relevant clinical experts followed by fortnightly supervision to support clinical implementation and fidelity.

### *Usual care*

No systematised parenting pathway was typically provided for the participant population. (REF). To provide consistent and low intensity support, participants could choose to receive a single one-to-one parent information and support session in addition to their existing care.

1  
2  
3 Derived from the evidence-based Empowering Parents Empowering Communities parenting  
4 programme, [45] session content included: (i) brief exploration of parenting and child needs,  
5 family support, parent priorities and goals, and (ii) focus on one parent priority topic, selected  
6 from Being Good Enough, Listening to My Child, Praising My Child, Taking Care of Myself,  
7 Understanding My Child's Behaviour, My Child's Emotion or Playing Together. The  
8 additional session was delivered by three trained parent practitioners, who received ongoing  
9 supervision to support implementation and fidelity, including module content delivery.

### 16 *Concomitant interventions*

17 Trial interventions were delivered in conjunction with existing medical, psychosocial and  
18 educational support and treatment services used by participating parents and their families.

## 22 **Measures**

### 24 *Participant characteristics*

25 Descriptive data were collected on parent and child age, gender and ethnicity, family  
26 household composition, participant diagnostic, status, and family socio-economic status. Data  
27 from EQ-5D, [46] a standardised measure of health status developed by EuroQol Group,  
28 provided information about parent and child health and disability.

### 34 *Feasibility evaluation*

35 Structured record sheets, completed prospectively by research staff and trial therapists,  
36 documented (i) participant identification and verbal consent, (ii) screening, eligibility,  
37 informed written consent, randomisation, and reasons for non-participation, and (iii) data  
38 collection, including reasons for missing data.

### 43 *Clinical outcomes*

- 45 • **Eyberg Child Behavior Inventory (ECBI)**, [47] a 36-item questionnaire assessing  
46 intensity and number of disruptive behaviour problems in 2-16 year-olds, providing a  
47 comprehensive measure of child behaviour difficulties. Intensity Scale score of  $\geq 131$   
48 indicates significant severity. Problem Scale score of  $\geq 15$  indicates significant number  
49 of problems.
  - 50 • **Concerns About My Child (CAMC)**, [45] a visual analogue scale (0-100) rating three  
51 parental concerns about their child. Concerns nominated at baseline were re-rated at each  
52 time point, providing a sensitive, individualised index of change.
- 53  
54  
55  
56  
57  
58  
59  
60



- **Child Behavior Checklist-Internalising Scale (CBCL-Int)**,[48] a 32-item questionnaire assessing internalising problems in 6-18 year-olds, with an alternate 36-item version for children aged 1½-5 years. Standardised T-scores combine results from both versions. A score of  $\geq 60$  indicates clinical caseness.
- **Arnold-O’Leary Parenting Scale (PS)**,[49] a 30-item questionnaire assessing dysfunctional parental discipline behaviour for children aged 2-16 years, which correlates with more time-consuming observational ratings. A score of  $\geq 3.2$  differentiates clinic and non-referred children.
- **Kansas Parental Satisfaction Scale (KPSS)**,[50] a 3-item scale providing a brief measure of parenting stress and satisfaction.
- **Symptom Checklist-27 (SCL-27)**,[51] a 27-item questionnaire assessing psychological symptoms in adults that provides a Global Severity Index (GSI) of psychopathology.

#### *Intervention acceptability:*

- **Working Alliance Inventory-Short Revised (WAI-SR)**, [52], a parent completed 12-item questionnaire assessing quality of therapeutic relationship consisting of three subscales (i) Goals measures agreement on intervention goals and outcomes, (ii) Tasks measures agreement on behaviours and thoughts underpinning the intervention process, and (iii) Bond measures mutual trust, acceptance and confidence.
- Structured worksheets recording participant intervention uptake, session attendance, retention, reasons for missed sessions and dropout.

#### **Sample size**

The primary *a priori* feasibility criterion was post-intervention retention rate of at least 65% [40,41]. A confidence interval approach was used to calculate a planned sample size of  $N=70$  based on this primary criterion.[53] Using a 95% CI for the proportion of parents who completed treatment and an expected completion rate of 80% based on previous evaluations of HFP, it was determined that an HFP-M intervention sample size of  $n=35$  would provide a sufficiently precise estimate (95% CI .67-.93). A sample size of  $n=70$  was also sufficient to obtain stable estimates of population variances for future power calculations.[54]



## Recruitment and consent procedures

### *Settings*

Recruitment took place in two large UK NHS health services and concomitant local authority children's social care service in London (Site 1 and 2) located in areas of high mental health morbidity.

### *Identification and consent*

Clinical keyworkers undertook exploratory discussion and provided written information to potentially eligible participants. With consent, contact details were provided to researchers, who provided information about study aims, eligibility criteria, procedures, and a Participant Information Sheet. One week later, parents were contacted to determine participation and obtain written informed consent.

### *Allocation and randomisation*

Participants were allocated a unique, anonymised ID number and randomised to trial conditions between 11.05.16 and 29.03.17 by the Clinical Trials Unit, King's College, London. Allocation was communicated confidentially to the trial co-ordinator, other researchers remained blind to allocation status.

## Data collection

### *Screening and assessments*

Following consent, parents completed screening measures, and, when eligible, baseline measures in a standard sequence. Any parent discomfort was addressed sensitively and supportively. Subsequently, persistent and non-intrusive efforts were used to complete post-intervention and follow-up data collection. Participants were reimbursed £10 per hour for data completion at each time point.

### *Analysis*

Statistical analysis was mainly descriptive using means and standard deviations for continuous data, or medians and range where data were skewed. Frequencies and proportions were used to describe categorical variables. Feasibility of trial retention was assessed using the proportion of a predetermined parameter and estimated 95% CIs. Clinical outcomes were analysed using ANCOVA models to estimate likely range of intervention effect, by assessing 95% CI, at post-treatment, with pre-randomization values as a covariate.[55] Follow-up data were not included in these analyses due to a smaller sample than planned. Standardised effect

1  
2  
3 sizes were calculated by dividing the estimated treatment effect by the standard deviation at  
4 baseline (Cohen's d). Population variances for future power calculations were determined  
5 using the upper 80th percentile of confidence intervals around the estimated population  
6 variance.[55].  
7  
8  
9

## 10 **Patient and public involvement**

11  
12 A service user organisation senior staff member was co-applicant who contributed to the  
13 research conception, funding and governance. A service user researcher was involved in the  
14 analysis, interpretation and dissemination of findings. A service user advisory panel advised  
15 on intervention development, recruitment and screening methods, outcome selection and  
16 interpretation of study findings.[56]  
17  
18  
19  
20  
21

## 22 **Independent ethical review and NHS research & development** 23 **approval**

24  
25  
26 Ethics approval was obtained from Health Research Authority South East Coast - Brighton &  
27 Sussex Research Ethics Committee (reference: 16/LO/0199). Research and development  
28 approvals were obtained from South London and Maudsley NHS Foundation Trust and  
29 Central and North-West London NHS Foundation Trust.  
30  
31  
32  
33

## 34 **Serious adverse events**

35  
36 The chief investigator was responsible for reporting serious adverse events to the trial's  
37 independent Data Monitoring and Ethics Committee and responsible research ethics  
38 committee. No serious adverse events were reported.  
39  
40  
41  
42

## 43 **Results**

### 44 **Feasibility evaluation**

45  
46 Participant recruitment took four months longer than planned due to delays in Site 2,  
47 resulting in a revised sample size of 48. Obtaining referring keyworkers data on the total  
48 number of service users they approached about trial participation proved impractical.  
49  
50  
51

52  
53 All referred service users (n=89, 100.0%) consented to research contact (see Figure 1). Adult  
54 mental health services (AMHS) referred 30 (33.7%) parents, child and adolescent mental  
55 health services (CAMHS) 29 (32.6%) parents, and children's social care (CSS) 30 (33.7%)  
56 parents. Sixty-five (73.0%) parents were referred by Site 1. Researchers made contact with  
57 87 (97.7%) parents, requiring 1 to 13 separate communications per participant.  
58  
59  
60

1  
2  
3 Sixty (69.7%) parents met initial criteria and completed screening. The most common reason  
4 for ineligibility was parents declining trial participation (n=12, 13.5%). Six parents were  
5 excluded due to child-related reasons, most commonly presence of child developmental  
6 disorder.  
7  
8  
9

10 Forty-eight consenting participants met parent and child screening criteria, all of whom  
11 completed baseline measures, representing 80.0% of screened parents, 53.9% of referred  
12 parents and 68.8% of the planned sample. Five (8.3%) met neither parent nor child screening  
13 criteria, four (6.7%) did not meet SAPAS criterion, and three (5.0%) did not meet SDQ  
14 criterion.  
15  
16  
17  
18

19 Thirty-six (75.0%) trial participants were from Site 1, exceeding the site recruitment target.  
20 Site 2 recruitment (n=12) was 34.3% of that planned, due to delayed recruitment and lower  
21 service engagement. Eighteen (37.5%) participants were referred by AMHS, 16 (33.3%)  
22 CAMHS and 14 (29.2%) CSS.  
23  
24  
25  
26

27 There was a significant difference in trial condition uptake (HFP-M: n=21, 87.5%; Usual care  
28 n=15, 62.5%;  $\chi^2=4.0$ ,  $df=1$  (48),  $p<0.05$ ). Modal duration between randomisation and  
29 starting HFP-M was 2 weeks (range 1-23 weeks). Parents declined HFP-M because one gave  
30 birth, another was in conflict with her partner about participation, and a third did not respond  
31 to persistent contact (see Figure 1). The modal duration before Usual care parenting session  
32 receipt was 5.5 weeks (range 1-17 weeks). The most common reason for declining the  
33 additional Usual care parenting session was that participants hoped to be allocated to HFP-M.  
34  
35  
36  
37  
38  
39

40 At post-intervention, 32 (66.7%, 95% C.I. 51.6% to 79.6%) participants completed post-  
41 intervention measures. The majority of participants who did not take up the intervention  
42 offered, mainly in the Usual care condition, did not complete post-intervention measures.  
43  
44  
45

46 Twenty-one (65.6%) parents completing post-intervention measures were also assessed at  
47 follow-up, representing 43.8% of all trial participants. Post-intervention measures were  
48 completed a mean of 42.0 weeks (SD 14.6) after baseline, due to HFP-M delivery being  
49 lengthier in duration than planned. Follow-up measures were completed a mean of 20 weeks  
50 (SD 8.9) later. Researchers required one to eight participant contacts to arrange data  
51 completion post-intervention and at follow-up. Main reasons for non-completion included  
52 unable to contact participant, participant declining completion, and participant health and life  
53 circumstances.  
54  
55  
56  
57  
58  
59  
60

There were less than 0.1% missing data items across measures at each time point.

## Sample characteristics

### *Demographic characteristics*

All 48 participants were the biological parent of the index child, one was a father (2.1%) (see Table 1). The majority were lone parents (n=31, 67.4%), mean age, 34.9 (SD. 7.1). The majority (n=28, 61.0%) were White British/Irish, with fewer Black/Black British (n=9, 19.6%) and Dual Heritage (n=6, 13.5%) parents. English was the most common first language (n=44, 91.7%). Twenty-five (55.6%) participants completed education at 18 years or younger. Four participants (8.9%) were higher education graduates.

Most participants (n=37, 80.4%) were not in paid employment. Nine participants (19.5%) had partners in paid employment, predominantly part-time (n=7, 15.2%). No parent was in paid employment in 30 (65.2%) households. Twenty-five (86.2%) parents had received a formal psychiatric diagnosis, the mean time since initial diagnosis was 9.7 (7.4) years.

Twenty-six (54.2%) index children were male, with a mean age of 7.8 (SD. 2.2) years. The median number of children in the home was 2, range 1-5 (see Table 1). Participants reported significant difficulties with anxiety/depression, pain/discomfort, and with a smaller proportion experiencing difficulties in undertaking everyday activities (see Table 1).

### *Clinical characteristics*

Over eighty per cent of ECBI Problem and Intensity scores at baseline exceeded the clinical caseness cut-off, with similar caseness rates for CBCL-Int and PS (see Table 2). The most common baseline CAMC child-related parent concerns were conduct, self-regulation, parent-child relationships and emotional distress (see Table 3).

## Trial interventions acceptability

### *HFP-M attendance*

Of the 21 participants who accepted HFP-M, 13 (61.9%, 95% C.I. 38.4% to 81.9%) completed HFP-M within the trial period. Six (28.6%, 95% C.I. 11.3% to 52.2%) withdrew before completion due to acute adult mental health crisis and complex family circumstances unrelated to HFP-M receipt. Recruitment delay and longer than anticipated intervention duration resulted in two (9.5%, 95% C.I.: 1.2% to 30.4%) participants not completing HFP-M before trial conclusion. The mean number of HFP-M appointments offered was 15.8 (SD.

1  
2  
3 7.7) and mean number attended was 11.2 (SD. 6.3). HFP-M appointment attendance was  
4 70.2%. Mean duration of HFP-M delivery was 28.4 (SD. 21.7) weeks.  
5  
6

### 7 *HFP-M therapeutic alliance acceptability*

8  
9 Eighteen (85.3%) HFP-M participants completed post-intervention WAI-SR (mean total  
10 score=73.8, SD 10.4). Mean subscales scores were consistently in the upper end of the scale  
11 (Mean Tasks Subscale score, 24.9, SD. 3.5; Bond Subscale score, 24.9, SD. 3.9; Goals  
12 Subscale score.23.9, SD. 4.1).  
13  
14  
15

### 16 *Usual Care*

17  
18 All 15 participants accepting the additional parenting session completed. Due to lower  
19 retention, only six participants provided post-intervention WAI-SR data (mean total score=  
20 56.2, SD 18.8). Mean subscales scores were consistently lower than the HFP-M condition  
21 (Mean Tasks Subscale score, 17.4, SD. 7.2; Bond Subscale score, 19.8, SD. 7.1; Goals  
22 Subscale score, 19.0, SD. 7.6).  
23  
24  
25  
26

27  
28 There appeared to be a substantial difference in WAI-SR scores between the two conditions  
29 but there was insufficient Usual care data to test for a statistical difference.  
30  
31

32  
33 No adverse events were reported over the course of the trial. Participant intervention  
34 withdrawal most frequently occurred due to deterioration in participant mental health and life  
35 circumstances, unrelated to trial participation.  
36  
37

### 38 **Clinical outcomes**

39  
40 There were estimated mean improvements from baseline scores across a number of variables  
41 within both trial conditions (see Table 4). HFP-M mean differences exceeded those in Usual  
42 care on several outcomes, though these findings should be treated with caution given the  
43 wide confidence intervals.  
44  
45  
46

47  
48 Estimated effect sizes showed a general post-intervention advantage for HFP-M on a range of  
49 outcomes. Medium effects for child behavioural problem severity (ECBI Intensity, ES 0.4,  
50 CI, -0.3-1.1), and parenting satisfaction (KPSS, ES 0.4, CI, -0.3-1.1) were detected and a  
51 large effect size parent-reported reductions in concerns about their child (CAMC Problem 1,  
52 ES 1.2, CI, 0.4-2.0, CAMC Problem 2, ES 1.3, CI, 0.5-2.1). No effects were detected for  
53 parenting behaviour and adult mental health outcomes. Descriptive scrutiny of follow-up  
54 findings showed that outcome scores across both groups were generally maintained or  
55 continued to improve.  
56  
57  
58  
59  
60

1  
2  
3 Estimates of standard deviation and upper confidence intervals (u80% CI) for future power  
4 calculations of main clinical outcomes are: ECBI Problem: SD 6.73 (u80%CI: 7.59), ECBI  
5 Intensity SD 33.60 ((u80%CI: 37.14), CAMC Problem 1: SD 15.25 (u80%CI: 17.44), and  
6 KPSS: 2.95 ((u80%CI: 3.33).  
7  
8  
9

## 10 11 **Conclusion**

12  
13 This study assessed feasibility, identified potential challenges and informed decision-making  
14 for the research and intervention methods of a definitive HFP-M trial.[28-30,39] Participant  
15 identification methods were successfully implemented across a wide range of mental health  
16 and CSS teams with over 90% of referred parents meeting dual child and parent screening  
17 criteria. Non-diagnostic eligibility criteria were acceptable and effective in recruiting an  
18 appropriate, multi-morbid sample.[57,58] Negative life events and disrupted family  
19 functioning, characteristic of the sample population commonly delayed screening, data  
20 collection and intervention delivery.[7] Nevertheless, participant retention exceeded the *a*  
21 *priori* primary feasibility criterion of 65%. Participants declining intervention conditions  
22 were less likely to be retained at follow-up. Participant recruitment was slower than planned,  
23 mainly due to operational difficulties in one site.  
24  
25  
26  
27  
28  
29  
30  
31  
32

33 Participants' multi-morbid characteristics are commonly associated with poorer treatment  
34 engagement and outcomes.[59,60] Intervention uptake differed substantially between trial  
35 conditions. HFP-M was largely acceptable to participants but delivery was less efficient than  
36 planned, often due to session cancellation prompted by parents' life circumstances. The  
37 Usual care condition appeared to be less acceptable to participants, and potentially affected  
38 participant retention. Lower Usual care retention and acceptability rates may also reflect  
39 more widespread participant dissatisfaction associated with control condition  
40 allocation.[61,62]  
41  
42  
43  
44  
45  
46  
47

48 Clinical effects, detected across trial conditions, with potential advantage for HFP-M, are  
49 welcome given the population's complex parenting impairments and negative treatment  
50 expectancies.[2,60] Effects were detected for child behaviour, parental child concerns and  
51 parenting satisfaction. Participant recruitment and retention affected final sample size,  
52 limited trial power and consequently affected interpretation of these findings. A definitive  
53 trial could potentially narrow child selection criteria to include only behaviour problems as  
54 parenting programmes have an established evidence base for this condition. Alternatively, the  
55 less substantial effects for child internalising difficulties may require strengthening HFP-M  
56  
57  
58  
59  
60

1  
2  
3 content specifically in relation to these difficulties. Economic analysis also indicated  
4 potential cost advantages for HFP-M over usual care.[42]  
5  
6

7 HFP-M and Usual care conditions differed in duration and therapeutic intensity, which may  
8 account for potential outcome differences. Data collection relied on parent self-report, which  
9 is conventional given the poor reliability of child-report across the age group and costs  
10 associated with independent ratings.  
11  
12  
13

14  
15 A future definitive trial should be based on the assumption of a medium effect size for the  
16 primary outcome of child behaviour. Site engagement, resource allocation and keyworker  
17 training in participant identification and recruitment will be crucial to the recruitment of the  
18 larger sample required in a future trial. Embedded researchers to assist in caseload  
19 identification and undertake direct parent recruitment, not possible in this feasibility study,  
20 may promote trial recruitment flow. Participant retention, particularly parents allocated to a  
21 usual care condition, will continue to be challenging in a full trial. The population's complex  
22 personality difficulties and, typically, heightened sensitivity to rejection, underline the  
23 importance of researchers managing sensitively and effectively trial consent procedures, the  
24 emotional and practical consequences of random allocation as well as proactively  
25 maintaining communication and validating relationships with participants throughout trial  
26 duration, particularly for those allocated to usual care. Though not routinely available, the  
27 usual care condition could be augmented with an on-going parent support group to potentially  
28 increase equipoise, face validity and uptake, which may benefit trial retention.  
29  
30  
31  
32  
33  
34  
35  
36  
37  
38

39 HFP-M clinical and trial efficiency may be improved through more explicit, validating  
40 discussion with participants about the potential impact of life and personal circumstances on  
41 attendance, use of pre-emptive cancellation plans, and inclusion of inter-session contact using  
42 digital technology.[31,60,63]  
43  
44  
45  
46  
47  
48

49 Word count: 3993  
50  
51  
52  
53  
54  
55  
56  
57  
58  
59  
60



## References

- [1] Fergusson, D., Horwood, L. & Ridder, E. (2005). Show me the child at seven: The consequences of conduct problems in childhood for psychosocial functioning in adulthood. *J Child Psychol Psyc*, 46, 837-849.
- [2] Petfield, L., Startup, H., Droscher, H. & Cartwright-Hatton, S. (2015) Parenting in mothers with borderline personality disorder and impact on child outcomes. *Evid Based Ment Health*, 18(3), 67-75.
- [3] Eyden, J., Winsper, C., Wolke, D., Broome, M. & MacCallum, F. (2016). A systematic review of the parenting and outcomes experienced by offspring of mothers with borderline personality pathology: Potential mechanisms and clinical implications. *Clin Psychol Rev*, 47, 85–105.
- [4] Day, C., Harris, L., McCrone, P., McMurrin, M., Moran, P., Morgan, L. et al. (2017) Feasibility trial of a psychoeducational intervention for parents with personality difficulties: The Helping Families Programme. *Contemporary Clinical Trials Communications*, 8, 67-74. doi.org/10.1016/j.conctc.2017.08.002.
- [5] Ackerson, B. (2003). Coping with the dual demands of severe mental illness and parenting: The parents' perspective. *Fam Soc*, 84, 109-119.
- [6] Newton-Howes, G., Weaver, T. & Tyrer, P. (2008). Attitudes of staff towards patients with personality disorder in community mental health teams. *Aust Nz J P Psychiat*, 42, 572-577.
- [7] Coid, J., Yang, M., Tyrer, P. & Roberts, A. (2006). Prevalence and correlates of personality disorder in Great Britain. *Brit J Psychiat*, 188, 423-431.
- [8] Newton-Howes, G., Tyrer, P., Anagnostakis, K., Cooper, S., Bowden-Jones, O. & Weaver, T. (2010). The prevalence of personality disorder, its comorbidity with mental state disorders, and its clinical significance in community mental health teams. *Soc Psych Psych Epid*, 45, 453-460.
- [9] McCrone, P., Patel, A., Knapp, M. & Lawton-Smith, S. (2008). *Paying the price: The cost of mental health care in England to 2026*. London: King's Fund. Available at: <http://www.kingsfund.org.uk/sites/files/kf/Paying-the-Price-the-cost-of-mental-health-care->



1  
2  
3 England-2026-McCrone-Dhanasiri-Patel-Knapp-Lawton-Smith-Kings-Fund-May-  
4 2008\_0.pdf  
5

6  
7 [10] Johnson, J., Cohen, P., Kasen, S., Ehrensaft, M. & Crawford, T. (2006). Associations of  
8 parental personality disorders and axis I disorders with childrearing behavior. *J Am Acad*  
9 *Child Psy*, 69, 336-350.  
10

11  
12 [11] Newman, L., Stevenson, C., Bergman, L. & Boyce, P. (2007). Borderline personality  
13 disorder, mother-infant interaction and parenting perceptions: Preliminary findings. *Aust Nz J*  
14 *Psychiat*, 41, 598-605.  
15

16  
17 [12] Green, H., McGinnity, A., Meltzer, H., Ford, T. & Goodman, R. (2005). *Mental health*  
18 *of children and young people in Great Britain, 2004*. Basingstoke: Palgrave Macmillan.  
19 Available at: <http://www.esds.ac.uk/doc/5269/mrdoc/pdf/5269technicalreport.pdf>  
20  
21

22  
23 [13] Davis, H., Day, C., Cox, A. & Cutler L. (2000). Child and adolescent mental health  
24 needs assessment and service implications in an inner-city area. *Clin Child Psychol P*, 5, 169-  
25 188.  
26

27  
28 [14] Romeo R, Knapp M, Scott S. (2006). Economic cost of severe antisocial behaviour in  
29 children and who pays it. *Br J Psychiatry*, 188(6):547–553.  
30

31  
32 [15] Parsonage M, Khan L, Saunders (2014). *Building a better future: The lifetime costs of*  
33 *childhood behavioural problems and the benefits of early intervention*. Lond Cent  
34  
35  
36  
37  
38  
39  
40  
41  
42  
43  
44  
45  
46  
47  
48  
49  
50  
51  
52  
53  
54  
55  
56  
57  
58  
59  
60  
Ment Health.

[16] Department of Health, Department for Education (2017). *Transforming Children and*  
*Young People's Mental Health Provision: a Green Paper*. London: DoH/DfE.

[17] Social Care Institute for Excellence (2011) Think child, think parent, think family: a  
guide to parental mental health and child welfare.  
<https://www.scie.org.uk/publications/guides/guide30/summary.asp>. Last accessed 31.05.18.

[18] Allen, G. (2011). *Early intervention: The next steps*. London: Cabinet Office. Available  
at: <http://www.dwp.gov.uk/docs/early-intervention-next-steps.pdf>. Last accessed 22.11.18

[19] Mental Health Taskforce (2016). The Five Year Forward View of Mental Health.  
Mental Health taskforce. Available at: [www.england.nhs.uk/mentalhealth/taskforce](http://www.england.nhs.uk/mentalhealth/taskforce). Last  
accessed 22.11.18

- 1  
2  
3 [20] Parker, G., Beresford, B., Clarke, S. et al (2008). *Technical report for SCIE Research*  
4 *Review on the prevalence and incidence of parental mental health problems and the*  
5 *detection, screening and reporting of parental mental health problems.* Working Paper No.  
6 SCIE 2247: University of York.  
7  
8  
9  
10  
11 [21] Wilson, R., Weaver, T., Michelson, D. & Day, C. (2018) Experiences of parenting and  
12 clinical intervention for mothers affected by personality disorder: a pilot qualitative study  
13 combining parent and clinician perspectives. *BMC Psychiatry*, 18,152.  
14 doi.org/10.1186/s12888-018-1733-8.  
15  
16  
17  
18  
19 [22] National Institute for Health and Clinical Excellence (2013). *Antisocial behaviour and*  
20 *conduct disorders in children and young people: Recognition, intervention and management.*  
21 London: NICE.  
22  
23  
24  
25 [23] Michelson, D., Day, C., Dretzke., Davenport, C. & Barlow, J. (2013) Do evidence-based  
26 interventions work when tested in the "real world?" A systematic review and meta-analysis  
27 of parent management training for the treatment of child disruptive behavior. *Clin Child Fam*  
28 *Psych*, 16(1), 18-34.  
29  
30  
31  
32  
33 [24] Reyno, S. & McGrath, P. (2006). Predictors of parent training efficacy for child  
34 externalizing behavior problems: A meta-analytic review. *J Child Psychol Psyc*, 47, 99-111.  
35  
36  
37 [25] Lundahl, B., Risser, H. J., & Lovejoy, M. C. (2006). A meta-analysis of parent training:  
38 Moderators and follow-up effects. *Clin Psychol Rev*, 26(1), 86-104.  
39  
40  
41  
42 [26] Dawe, S., & Harnett, P. H. (2007). Improving family functioning in methadone  
43 maintained families: Results from a randomised controlled trial. *J Subst Abuse Treat*, **32**,  
44 381-390.  
45  
46  
47  
48 [27] Thanhäuser M, Lemmer G, de Girolamo G, Christiansen H. (2017) Do preventive  
49 interventions for children of mentally ill parents work? Results of a systematic review and  
50 metaanalysis. *Curr Opin Psychiatry*;30(4):283–299.  
51  
52  
53  
54 [28] Craig, P., Dieppe, P., Macintyre, S., Michie, S., Nazareth, I. & Petticrew, M. (2008).  
55 *Developing and evaluating complex interventions: New guidance.* London: Medical Research  
56 Council.  
57  
58  
59  
60

- 1  
2  
3 [29] Hoffman, T., Glasziou, P., Boutron, I., Milne, R., & Perera, R. (2014). Better reporting  
4 of interventions: Template for intervention description and replication (TIDieR) checklist and  
5 guide. *Brit Med J*, 348:g1687  
6  
7  
8  
9 [30] Eldridge, S., Chan, C., Campbell, M., Bond, C., Hopewell, S., Thabane, L et al. (2016).  
10 CONSORT 2010 statement: extension to randomised pilot and feasibility trial *Pilot*  
11 *Feasibility Stud*, 2:64.  
12  
13  
14  
15 [31] Bateman, A. W., & Fonagy, P. (2000). Effectiveness of psychotherapeutic treatment of  
16 personality disorder. *Brit J Psychiat*, 177(2), 138-143.  
17  
18  
19 [32] McMurrin, M., Crawford, M. J., Reilly, J.G., McCrone, P., Moran, P., Williams, H., et  
20 al. (2011). Psycho-education with problem solving (PEPS) therapy for adults with personality  
21 disorder: A pragmatic multi-site community-based randomised clinical trial. *Trials*, 12, 198.  
22  
23  
24  
25 [33] Day, C., Kowalenko, S., Ellis, M., Dawe, S., Harnett, P. & Scott, S. (2011). The Helping  
26 Families Programme: A new parenting intervention for children with severe and persistent  
27 conduct problems. *Child Adol Ment H-UK*, 16, 167-171.  
28  
29  
30  
31 [34] Day, C., Ellis, M. & Harris. (2015). *Family Partnership Model Reflective Practice*  
32 *Handbook*. 2<sup>nd</sup> Edn. South London & Maudsley NHS Foundation Trust/King's College,  
33 London.  
34  
35  
36  
37 [35] McMurrin, M., Huband, N. & Overton, E. (2010). Non-completion of personality  
38 disorder treatments: A systematic review of correlates, consequences, and interventions. *Clin*  
39 *Psychol Rev*, 30, 277-287  
40  
41  
42  
43 [36] Tetley, A., Jinks, M., Huband, N., Howells, K & McMurrin, M. (2012). Barriers to and  
44 facilitators of treatment engagement for clients with personality disorder: A Delphi survey.  
45 *Personal Ment Health*, 6, 97-110.  
46  
47  
48  
49 [37] Kazdin AE. Acceptability of alternative treatments for deviant child behavior. *J Appl*  
50 *Behav Anal*. 1980;13(2):259–273.  
51  
52  
53  
54 [38] Foster SL, Mash EJ. Assessing social validity in clinical treatment research: Issues and  
55 procedures. *J Consult Clin Psychol*. 1999;67(3):308.  
56  
57  
58 [39] Bugge, C., Williams, B., Hagen, S., Logan, J., Glazener, C., Pringle, S., et al. (2013). A  
59 process for Decision-making after Pilot and feasibility Trials (ADePT): development  
60

1  
2  
3 following a feasibility study of a complex intervention for pelvic organ prolapse. *Trials*,  
4 14:353. doi: 10.1186/1745-6215-14-353. PubMed.

7 [40] Oud M, Arntz A, Hermens ML, Verhoef R, Kendall T. Specialized psychotherapies for  
8 adults with borderline personality disorder: A systematic review and meta-analysis. *Aust N Z*  
9 *J Psychiatry*. 2018;52(10):949–961.

12 [41] McMurrin M, Huband N, Overton E. Noncompletion of personality disorder treatments:  
13 A systematic review of correlates, consequences, and interventions. *Clin Psychol Rev*.  
14 2010;30(3):277–287.

17 [42] Day C, Briskman J, Crawford MJ, Foote L, Harris L, Boadu J, et al. Helping Families  
18 Programme-Modified: Development of a Specialised Parenting Intervention for Parents  
19 Affected by Severe Personality Difficulties and Randomised Feasibility Trial. *Health Technol*  
20 *Assess*. *Accepted for publication*.

23 [43] Moran, P., Leese, M., Lee, T., Walters, P., Thornicroft, G. & Mann, A. (2003). The  
24 Standardised Assessment of Personality - Abbreviated Scale (SAPAS): Preliminary  
25 validation of a brief screen for personality disorder. *Brit J Psychiat*, 183, 228-232.

28 [44] Goodman, R., Ford, T., Richards, H., Gatward, R. & Meltzer, H. (2000). The  
29 Development and Well-Being Assessment: Description and initial validation of an integrated  
30 assessment of child and adolescent psychopathology. *J Child Psychol Psyc*, 41, 645-655.

33 [45] Day, C., Michelson, M., Thomson, S., Penney, C. & Draper, L. (2012). Evaluation of a  
34 peer-led parenting intervention for child behaviour problems: A community-based  
35 randomised controlled trial. *Brit Med J*, 344, e1107.

38 [46] van Reenen, M. & Janssen, B. (2015). *EQ-5D-5L User Guide*. Available at:  
39 [https://euroqol.org/wp-content/uploads/2016/09/EQ-5D-5L\\_UserGuide\\_2015.pdf](https://euroqol.org/wp-content/uploads/2016/09/EQ-5D-5L_UserGuide_2015.pdf) [Accessed  
40 29 May 2018].

43 [47] Eyberg, S. & Ross, A.W. (1978). Assessment of child behaviour problems: The  
44 validation of a new inventory. *J Clin Child Psychol*, 7:2, 113-  
45 116, DOI: [10.1080/15374417809532835](https://doi.org/10.1080/15374417809532835)

48 [48] Achenbach, T. & Rescorla, L. (2001). *Manual for the ASEBA School-Age Forms and*  
49 *Profiles*. Burlington, VT: University of Vermont, Research Center for Children, Youth &  
50 Families.

- 1  
2  
3 [49] Arnold, D., O’Leary, S., Wolff, L. & Acker, M. (1993). The Parenting Scale: A measure  
4 of dysfunctional parenting in discipline situations. *Psychol Assessment*, 5, 137-144.  
5  
6  
7 [50] James, D., Schumm, W., Kennedy, C., Grigsby, C., Shectman, K. & Nichols, C. (1985).  
8 Characteristics of the Kansas parental satisfaction scale among two samples of married  
9 parents. *Psychol Rep*, 57, 163-169.  
10  
11  
12 [51] Müller, J., Postert, C., Beyer, T., Furniss, T. & Achtergarde, S. (2010). Comparison of  
13 eleven short versions of the Symptom Checklist 90-Revised (SCL-90-R) for use in the  
14 assessment of general psychopathology. *Psychol Assessment*, 32, 246-254.  
15  
16  
17 [52] Hatcher, R., & Gillaspay, J. (2006). Development and validation of a revised short  
18 version of the Working Alliance Inventory. *Psychother Res*, 16, 12-25.  
19  
20  
21 [53] Hertzog, M. (2009). Considerations in determining sample size for pilot studies. *Res*  
22 *Nurs Health*, 31, 180-191.  
23  
24  
25 [54] Browne, R. (1995). On the use of a pilot sample for sample size determination. *Stat Med*,  
26 *14*, 1933-1940.  
27  
28  
29 [55] Brown, H. & Prescott. R. (2007). *Applied Mixed Models in Medicine. Second Edition*.  
30 New York: John Wiley & Sons.  
31  
32  
33 [56] INVOLVE (2010). *Payment for Involvement: A guide for making payments to members*  
34 *of the public actively involved in NHS, public health and social care research*. INVOLVE:  
35 Eastleigh.  
36  
37  
38 [57] McMurrin, M., Delport, J., Wood, K., Jenkins, S., Wall, M. & Day, F. (2012).  
39 Recruitment to personality disorder treatment trials. *MHRJ*, 17, 119-128.  
40  
41  
42 [58] Stines, L. & Feeny, N. (2008) Unique ethical concerns in clinical trials comparing  
43 psychosocial and psychopharmacological interventions. *Ethics Behav*, 18:2-3, 234-246, DOI:  
44 10.1080/10508420802064333  
45  
46  
47 [59] Cooper, A & Conklin, L (2015) Dropout from individual psychotherapy for major  
48 depression: A meta-analysis of randomized clinical trials. *Clin Psychol Rev*, 40 57–65  
49  
50  
51 [60] Barnicot, K., Katsakou, C., Marougka, S. & Priebe, S. (2011) Treatment completion in  
52 psychotherapy for borderline personality disorder – a systematic review and meta-analysis.  
53 *Acta Psychiat Scand*, 123: 327–338  
54  
55  
56  
57  
58  
59  
60

1  
2  
3 [61] Lindström, D., Sundberg-Petersson, I., Adami, J. & Tønnesen, H. (2010)

4 Disappointment and drop-out rate after being allocated to control group in a smoking  
5 cessation trial. *Contemp Clin Trials*, 1, 22-6. doi: 10.1016/j.cct.2009.09.003.  
6  
7

8  
9 [62] Cook TD, Campbell DT: Quasi-experimentation: Design and Analysis Issues for Field  
10 Settings. Chicago, Rand McNally, 1979  
11

12  
13 [63] McMain, S., Boritz, T., & Leybman, M. (2015). Common strategies for cultivating a  
14 positive therapy relationship in the treatment of borderline personality disorder. *J Psychother*  
15 *Integr*, 25(1), 20-29.  
16  
17  
18  
19  
20  
21  
22  
23  
24  
25  
26  
27  
28  
29  
30  
31  
32  
33  
34  
35  
36  
37  
38  
39  
40  
41  
42  
43  
44  
45  
46  
47  
48  
49  
50  
51  
52  
53  
54  
55  
56  
57  
58  
59  
60

For peer review only

**Table 1: Participant demographic characteristics**

| Demographic characteristics                                   |                                              | Baseline (Time 1) |              |            |
|---------------------------------------------------------------|----------------------------------------------|-------------------|--------------|------------|
|                                                               |                                              | Total             | Intervention | Usual Care |
| Parent gender (Female) (n, %)                                 |                                              | 47 (97.9)         | 24 (100.0)   | 23 (95.8)  |
| Parent age (yrs.)(mean, SD)                                   |                                              | 34.9 (7.1)        | 34.7 (7.5)   | 35.0 (6.9) |
| Received psychiatric diagnosis (n, %)                         |                                              | 25 (86.2)         | 16 (88.9)    | 9 (81.8)   |
| Psychiatric diagnosis duration (years, mean, SD)              |                                              | 9.7 (7.4)         | 8.6 (7.0)    | 10.9 (8.1) |
| Parent relationship to index child (biological parent) (n, %) |                                              | 46 (100.0)        | 24 (100.0)   | 22 (100.0) |
| Index child gender (male) (n, %)                              |                                              | 26 (55.3)         | 12 (50.0)    | 14 (60.9)  |
| Index child age (mean, SD)                                    |                                              | 7.8 (2.2)         | 7.7 (2.0)    | 7.9 (2.2)  |
| Number of children at home (median, range)                    |                                              | 2 (1-5)           | 2 (1-5)      | 2 (1-5)    |
| Not in paid employment                                        |                                              | 37 (80.4)         | 19 (79.2)    | 18 (81.8)  |
| Lone parent (n, %)                                            |                                              | 31 (67.4)         | 14 (58.3)    | 17 (77.3)  |
| Partner in employment                                         |                                              | 9 (19.5)          | 6 (25.0)     | 3 (12.5)   |
| Parent education                                              | Graduate                                     | 4 (8.9)           | 2 (8.3)      | 2 (9.5)    |
|                                                               | University not completed                     | 3 (6.7)           | 3 (12.5)     | 0 (0.0)    |
|                                                               | Other e.g. NVQ                               | 13 (28.9)         | 6 (25.0)     | 7 (33.3)   |
|                                                               | Left school 18yrs                            | 9 (20.0)          | 4 (16.7)     | 5 (23.8)   |
|                                                               | Left school 16 years                         | 7 (15.6)          | 4 (16.7)     | 3 (14.3)   |
|                                                               | Left school under 16                         | 9 (20.0)          | 5 (20.9)     | 4 (19.0)   |
| Ethnicity                                                     | White UK/Irish                               | 28 (61.0)         | 13 (54.2)    | 15 (68.2)  |
|                                                               | Black UK/African Caribbean                   | 9 (19.6)          | 7 (29.2)     | 2 (9.1)    |
|                                                               | Dual heritage                                | 6 (13.0)          | 3 (12.5)     | 3 (13.6)   |
|                                                               | Black UK/African                             | 2 (4.3)           | 0 (0.0)      | 2 (9.1)    |
|                                                               | Other                                        | 1 (2.2)           | 1 (4.2)      | 0 (0.0)    |
| Parent health status <sup>1</sup>                             | Mobility problems                            | 9 (25.0)          | 4 (23.5)     | 5 (26.4)   |
|                                                               | Problems in self-care washing & dressing     | 3 (8.3)           | 1 (5.9)      | 2 (10.5)   |
|                                                               | Difficulties in undertaking usual activities | 13 (36.1)         | 7 (41.1)     | 6 (31.6)   |
|                                                               | Suffered pain/discomfort                     | 17 (47.2)         | 6 (35.3)     | 11 (57.9)  |

<sup>1</sup> EQ-5D-5L health moderate/severe status



**Table 2: Participant baseline clinical caseness**

| Measure                                          | Baseline  |              |            |
|--------------------------------------------------|-----------|--------------|------------|
|                                                  | Total     | Intervention | Usual care |
| ECBI Problem Caseness ( $\geq 15$ ) (n, %)       | 41 (89.1) | 21 (87.5)    | 20 (90.9)  |
| ECBI Intensity Caseness ( $\geq 131$ ) (n, %)    | 39 (83.0) | 19 (79.2)    | 20 (83.3)  |
| CBCL-Int (t-score) Caseness ( $\geq 60$ ) (n, %) | 45 (95.8) | 23 (95.8)    | 22 (95.7)  |
| PS Caseness ( $\geq 3.2$ ) (n, %)                | 35 (74.5) | 18 (75.0)    | 17 (73.9)  |

**Table 3: Parent-reported concerns about index child**

| Concern Category                          | Primary   | Secondary | Tertiary  | Total     |
|-------------------------------------------|-----------|-----------|-----------|-----------|
| Conduct problems <sup>1</sup>             | 18 (38.3) | 27 (58.7) | 24 (53.3) | 69 (50.0) |
| Parent-child relationship & communication | 16 (34.0) | 2 (4.4)   | 4 (8.9)   | 22 (15.9) |
| Child self regulation <sup>2</sup>        | 4 (8.5)   | 11 (23.9) | 7 (15.6)  | 22 (15.9) |
| Emotional distress <sup>3</sup>           | 8 (17.0)  | 4 (8.8)   | 7 (15.6)  | 19 (13.8) |
| Other <sup>4</sup>                        | 1 (2.1)   | 2 (4.4)   | 1 (2.2)   | 4 (2.9)   |
| School                                    | 0 (0.0)   | 0 (0.0)   | 2 (4.4)   | 2 (1.5)   |
| Total                                     | 47        | 46        | 45        | 138       |

<sup>1</sup> including anger, tantrums, defiance, non-compliance, aggression, running away & lying; <sup>2</sup> including overactivity, poor concentration, overeating, & wetting; <sup>3</sup> including low mood, anxiety, low self-esteem; <sup>4</sup> including risk behaviours



| Measure | Group            | Baseline<br>Mean (SD)<br>(n) | Post-<br>intervention<br>Mean (SD)<br>(n) | Follow-up<br>Mean (SD)<br>(n) | Baseline/Post-<br>intervention<br>Estimated mean<br>difference (CI) | p                            | Effect<br>Size |                    |
|---------|------------------|------------------------------|-------------------------------------------|-------------------------------|---------------------------------------------------------------------|------------------------------|----------------|--------------------|
| CAMC    | Problem 1        | Intervention                 | 84.6 (16.0)<br>(n=24)                     | 45.2 (27.2)<br>(n=18)         | 58.2 (29.5)<br>(n=13)                                               | 18.633<br>(-40.177 to 2.910) | .087           | 1.2<br>(0.4-2.0)   |
|         |                  | Usual Care                   | 85.9 (14.7)<br>(n=22)                     | 63.1 (31.1)<br>(n=14)         | 53.3 (34.4)<br>(n=8)                                                |                              |                |                    |
|         | Problem 2        | Intervention                 | 85.0 (19.1)<br>(n=24)                     | 51.1 (31.9)<br>(n=18)         | 56.4 (35.5)<br>(n=13)                                               | 22.486<br>(-44.318 to -.654) | .044           | 1.3<br>(0.5-2.1)   |
|         |                  | Usual Care                   | 82.9 (15.7)<br>(n=22)                     | 72.5 (26.0)<br>(n=14)         | 66.5 (35.5)<br>(n=8)                                                |                              |                |                    |
|         | Problem 3        | Intervention                 | 81.0 (17.0)<br>(n=24)                     | 54.4 (33.8)<br>(n=17)         | 42.8 (35.4)<br>(n=13)                                               | 2.909<br>(-28.349 to 22.530) | .816           | 0.0<br>(-0.7-0.7)  |
|         |                  | Usual Care                   | 78.9 (18.5)<br>(n=22)                     | 57.3 (34.1)<br>(n=14)         | 39.6 (24.3)<br>(n=8)                                                |                              |                |                    |
| ECBI    | Problem<br>Score | Intervention                 | 22.1 (7.4)<br>(n=24)                      | 17.9 (8.5)<br>(n=15)          | 15.3 (9.4)<br>(n=13)                                                | 1.559<br>(-4.24=55 to 7.374) | .585           | 0.1<br>(-0.7-0.88) |
|         |                  | Usual Care                   | 22.43 (6.2)<br>(n=21)                     | 18.0 (11.5)<br>(n=14)         | 18.8 (12.3)<br>(n=8)                                                |                              |                |                    |

|                                 |                 |              |                        |                        |                        |                                  |      |                    |
|---------------------------------|-----------------|--------------|------------------------|------------------------|------------------------|----------------------------------|------|--------------------|
|                                 | Intensity Score | Intervention | 168.2 (35.9)<br>(n=24) | 142.4 (39.3)<br>(n=24) | 131.7 (43.0)<br>(n=18) | 12.866<br>(-4.24=55 to 7.374)    | .233 | 0.4<br>(-0.3-1.1)  |
|                                 |                 | Usual Care   | 169.5 (31.8)<br>(n=23) | 155.7 (49.6)<br>(n=14) | 148.9 (58.4)<br>(n=8)  |                                  |      |                    |
| CBCL-Int<br>(t-score)           |                 | Intervention | 72.9 (9.7)<br>(n=24)   | 69.6 (10.4)<br>(n=18)  | 68.2 (8.3)<br>(n=13)   | 1.853<br>(-9.023 to 5.317)       | .601 | 0.2<br>(-0.5-0.9)  |
|                                 |                 | Usual Care   | 70.9 (11.9)<br>(n=23)  | 70.9 (9.3)<br>(n=14)   | 69.6 (8.6)<br>(n=8)    |                                  |      |                    |
| KPSS                            |                 | Intervention | 10.1 (3.1)<br>(n=24)   | 12.9 (3.5)<br>(n=18)   | 14.9 (3.8)<br>(n=13)   | 1.177<br>(-1.260 to 3.615)       | .331 | 0.4<br>(-0.3-1.1)  |
|                                 |                 | Usual Care   | 10.9 (2.8)<br>(n=23)   | 12.4 (3.9)<br>(n=14)   | 13.6 (3.9)<br>(n=7)    |                                  |      |                    |
| PS                              |                 | Intervention | 111.0 (19.6)<br>(n=24) | 108.7 (16.5)<br>(n=18) | 98.3 (27.2)<br>(n=13)  | .210<br>(-14.776 to -<br>15.196) | .977 | 0.0<br>(-0.7-0.7)  |
|                                 |                 | Usual Care   | 113.5 (24.8)<br>(n=23) | 108.7 (28.9)<br>(n=14) | 98.1 (26.9)<br>(n=7)   |                                  |      |                    |
| SCL-27 Global Severity<br>Index |                 | Intervention | 1.8 (1.1)<br>(n=24)    | 1.6 (0.8)<br>(n=18)    | 1.9 (0.8)<br>(n=13)    | -.105<br>(-.599 to .389)         | .666 | -0.1<br>(-0.8-0.6) |
|                                 |                 | Usual Care   | 1.7 (0.8)<br>(n=22)    | 1.7 (0.9)<br>(n=14)    | 1.3 (1.0)<br>(n=8)     |                                  |      |                    |

**Table 4: Parent reported child, parenting and parent clinical outcomes (intention to treat analysis)**

1  
2  
3  
4  
5  
6  
7  
8  
9  
10  
11  
12  
13  
14  
15  
16  
17  
18  
19  
20  
21  
22  
23  
24  
25  
26  
27  
28  
29  
30  
31  
32  
33  
34  
35  
36  
37  
38  
39  
40  
41  
42  
43  
44  
45  
46  
47  
48  
49  
50  
51  
52  
53  
54  
55  
56  
57  
58  
59  
60

For peer review only

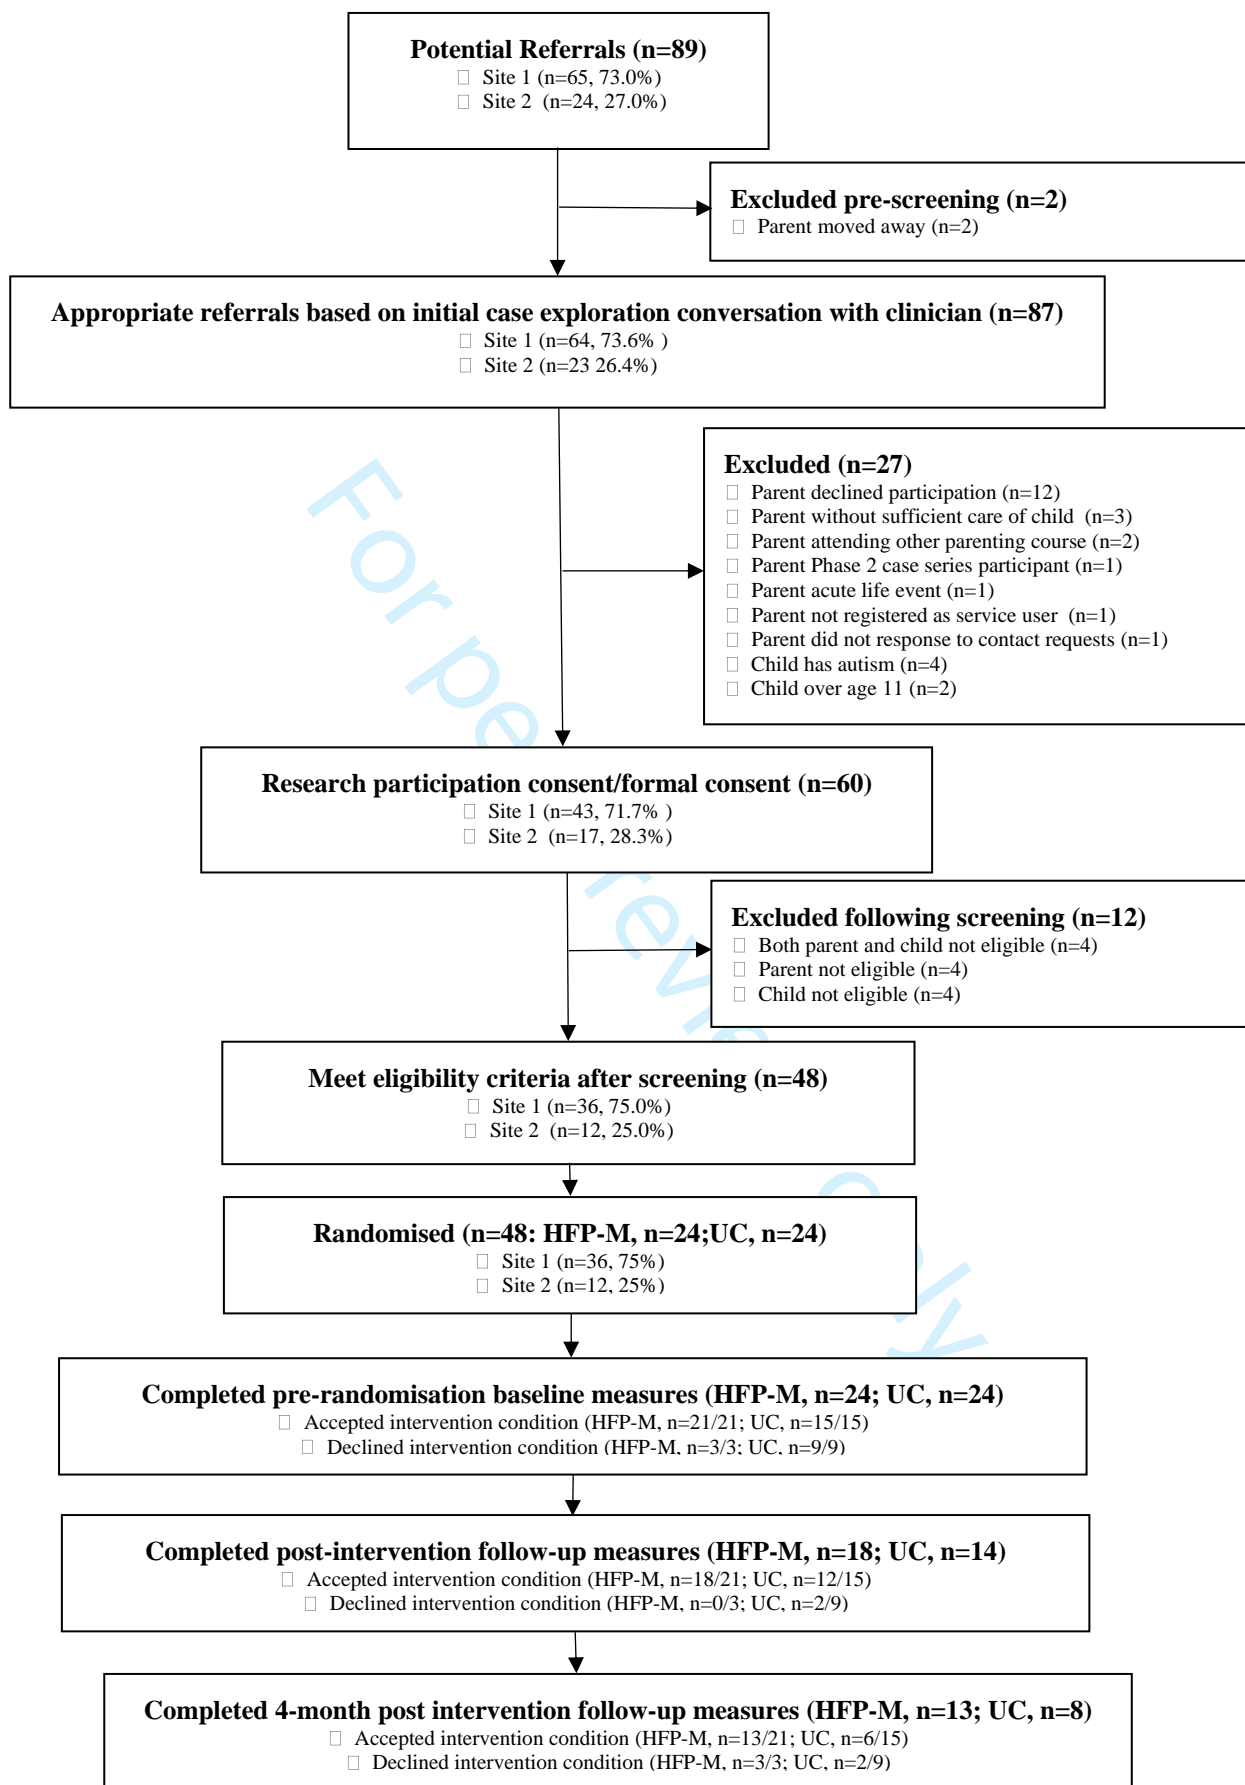

**Figure 1: CONSORT diagram randomised feasibility trial recruitment and retention**

1  
2  
3  
4  
5  
6  
7  
8  
9  
10  
11  
12  
13  
14  
15  
16  
17  
18  
19  
20  
21  
22  
23  
24  
25  
26  
27  
28  
29  
30  
31  
32  
33  
34  
35  
36  
37  
38  
39  
40  
41  
42  
43  
44  
45  
46  
47  
48  
49  
50  
51  
52  
53  
54  
55  
56  
57  
58  
59  
60

For peer review only

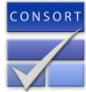

## CONSORT 2010 checklist of information to include when reporting a pilot or feasibility trial\*

| Section/Topic                    | Item No | Checklist item                                                                                                                                                                              | Reported on page No |
|----------------------------------|---------|---------------------------------------------------------------------------------------------------------------------------------------------------------------------------------------------|---------------------|
| <b>Title and abstract</b>        |         |                                                                                                                                                                                             |                     |
|                                  | 1a      | Identification as a pilot or feasibility randomised trial in the title                                                                                                                      | 1                   |
|                                  | 1b      | Structured summary of pilot trial design, methods, results, and conclusions (for specific guidance see CONSORT abstract extension for pilot trials)                                         | 2-3                 |
| <b>Introduction</b>              |         |                                                                                                                                                                                             |                     |
| Background and objectives        | 2a      | Scientific background and explanation of rationale for future definitive trial, and reasons for randomised pilot trial                                                                      | 8-10                |
|                                  | 2b      | Specific objectives or research questions for pilot trial                                                                                                                                   | 10                  |
| <b>Methods</b>                   |         |                                                                                                                                                                                             |                     |
| Trial design                     | 3a      | Description of pilot trial design (such as parallel, factorial) including allocation ratio                                                                                                  | 10                  |
|                                  | 3b      | Important changes to methods after pilot trial commencement (such as eligibility criteria), with reasons                                                                                    | 14, 15              |
| Participants                     | 4a      | Eligibility criteria for participants                                                                                                                                                       | 11                  |
|                                  | 4b      | Settings and locations where the data were collected                                                                                                                                        | 13,14               |
|                                  | 4c      | How participants were identified and consented                                                                                                                                              | 13,14               |
| Interventions                    | 5       | The interventions for each group with sufficient details to allow replication, including how and when they were actually administered                                                       | 11,12               |
| Outcomes                         | 6a      | Completely defined prespecified assessments or measurements to address each pilot trial objective specified in 2b, including how and when they were assessed                                | 12,13               |
|                                  | 6b      | Any changes to pilot trial assessments or measurements after the pilot trial commenced, with reasons                                                                                        | N/A                 |
|                                  | 6c      | If applicable, prespecified criteria used to judge whether, or how, to proceed with future definitive trial                                                                                 | 10                  |
| Sample size                      | 7a      | Rationale for numbers in the pilot trial                                                                                                                                                    | 13                  |
|                                  | 7b      | When applicable, explanation of any interim analyses and stopping guidelines                                                                                                                | N/A                 |
| Randomisation:                   |         |                                                                                                                                                                                             |                     |
| Sequence generation              | 8a      | Method used to generate the random allocation sequence                                                                                                                                      | 14                  |
|                                  | 8b      | Type of randomisation(s); details of any restriction (such as blocking and block size)                                                                                                      | 10                  |
| Allocation concealment mechanism | 9       | Mechanism used to implement the random allocation sequence (such as sequentially numbered containers), describing any steps taken to conceal the sequence until interventions were assigned | 14                  |

|    |                                                      |     |                                                                                                                                                                                       |                                                    |
|----|------------------------------------------------------|-----|---------------------------------------------------------------------------------------------------------------------------------------------------------------------------------------|----------------------------------------------------|
| 1  | Implementation                                       | 10  | Who generated the random allocation sequence, who enrolled participants, and who assigned participants to interventions                                                               | 14                                                 |
| 2  | Blinding                                             | 11a | If done, who was blinded after assignment to interventions (for example, participants, care providers, those assessing outcomes) and how                                              | 14                                                 |
| 3  |                                                      | 11b | If relevant, description of the similarity of interventions                                                                                                                           | 11,12                                              |
| 4  | Statistical methods                                  | 12  | Methods used to address each pilot trial objective whether qualitative or quantitative                                                                                                | 14                                                 |
| 5  | <b>Results</b>                                       |     |                                                                                                                                                                                       |                                                    |
| 6  | Participant flow (a diagram is strongly recommended) | 13a | For each group, the numbers of participants who were approached and/or assessed for eligibility, randomly assigned, received intended treatment, and were assessed for each objective | 15,16,28                                           |
| 7  |                                                      | 13b | For each group, losses and exclusions after randomisation, together with reasons                                                                                                      | 15,16,28                                           |
| 8  | Recruitment                                          | 14a | Dates defining the periods of recruitment and follow-up                                                                                                                               | 14,15,16                                           |
| 9  |                                                      | 14b | Why the pilot trial ended or was stopped                                                                                                                                              | N/A                                                |
| 10 | Baseline data                                        | 15  | A table showing baseline demographic and clinical characteristics for each group                                                                                                      | 29,30                                              |
| 11 | Numbers analysed                                     | 16  | For each objective, number of participants (denominator) included in each analysis. If relevant, these numbers should be by randomised group                                          | 15,16,28                                           |
| 12 | Outcomes and estimation                              | 17  | For each objective, results including expressions of uncertainty (such as 95% confidence interval) for any estimates. If relevant, these results should be by randomised group        | 15,16,17,18,19,31,32                               |
| 13 | Ancillary analyses                                   | 18  | Results of any other analyses performed that could be used to inform the future definitive trial                                                                                      | N/A                                                |
| 14 | Harms                                                | 19  | All important harms or unintended effects in each group (for specific guidance see CONSORT for harms)                                                                                 | 18                                                 |
| 15 |                                                      | 19a | If relevant, other important unintended consequences                                                                                                                                  | 18                                                 |
| 16 | <b>Discussion</b>                                    |     |                                                                                                                                                                                       |                                                    |
| 17 | Limitations                                          | 20  | Pilot trial limitations, addressing sources of potential bias and remaining uncertainty about feasibility                                                                             | 19,20                                              |
| 18 | Generalisability                                     | 21  | Generalisability (applicability) of pilot trial methods and findings to future definitive trial and other studies                                                                     | 20                                                 |
| 19 | Interpretation                                       | 22  | Interpretation consistent with pilot trial objectives and findings, balancing potential benefits and harms, and considering other relevant evidence                                   | 19,20                                              |
| 20 |                                                      | 22a | Implications for progression from pilot to future definitive trial, including any proposed amendments                                                                                 | 19,20                                              |
| 21 | <b>Other information</b>                             |     |                                                                                                                                                                                       |                                                    |
| 22 | Registration                                         | 23  | Registration number for pilot trial and name of trial registry                                                                                                                        | ISRCTN14573230                                     |
| 23 | Protocol                                             | 24  | Where the pilot trial protocol can be accessed, if available                                                                                                                          | From Chief Investigator:<br>rispin.1.day@kcl.ac.uk |

|         |    |                                                                                            |                                                                                                                  |
|---------|----|--------------------------------------------------------------------------------------------|------------------------------------------------------------------------------------------------------------------|
| Funding | 25 | Sources of funding and other support (such as supply of drugs), role of funders            | National Institute of Health Research, Health Technology Assessment, Project Reference Number: 12/194/01         |
|         | 26 | Ethical approval or approval by research review committee, confirmed with reference number | Health Research Authority South East Coast - Brighton & Sussex Research Ethics Committee (reference: 16/LO/0199) |

Citation: Eldridge SM, Chan CL, Campbell MJ, Bond CM, Hopewell S, Thabane L, et al. CONSORT 2010 statement: extension to randomised pilot and feasibility trials. *BMJ*. 2016;355.

\*We strongly recommend reading this statement in conjunction with the CONSORT 2010, extension to randomised pilot and feasibility trials, Explanation and Elaboration for important clarifications on all the items. If relevant, we also recommend reading CONSORT extensions for cluster randomised trials, non-inferiority and equivalence trials, non-pharmacological treatments, herbal interventions, and pragmatic trials. Additional extensions are forthcoming: for those and for up to date references relevant to this checklist, see [www.consort-statement.org](http://www.consort-statement.org).



# BMJ Open

## Randomised Feasibility Trial of the Helping Families Programme-Modified: An Intensive Parenting Intervention for Parents Affected by Severe Personality Difficulties

|                                 |                                                                                                                                                                                                                                                                                                                                                                                                                                                                                                                                                                                                                                                                                                                                                                                                                                                                                                                                                         |
|---------------------------------|---------------------------------------------------------------------------------------------------------------------------------------------------------------------------------------------------------------------------------------------------------------------------------------------------------------------------------------------------------------------------------------------------------------------------------------------------------------------------------------------------------------------------------------------------------------------------------------------------------------------------------------------------------------------------------------------------------------------------------------------------------------------------------------------------------------------------------------------------------------------------------------------------------------------------------------------------------|
| Journal:                        | <i>BMJ Open</i>                                                                                                                                                                                                                                                                                                                                                                                                                                                                                                                                                                                                                                                                                                                                                                                                                                                                                                                                         |
| Manuscript ID                   | bmjopen-2019-033637.R1                                                                                                                                                                                                                                                                                                                                                                                                                                                                                                                                                                                                                                                                                                                                                                                                                                                                                                                                  |
| Article Type:                   | Original research                                                                                                                                                                                                                                                                                                                                                                                                                                                                                                                                                                                                                                                                                                                                                                                                                                                                                                                                       |
| Date Submitted by the Author:   | 18-Dec-2019                                                                                                                                                                                                                                                                                                                                                                                                                                                                                                                                                                                                                                                                                                                                                                                                                                                                                                                                             |
| Complete List of Authors:       | Day, Crispin; King's College London, ; South London and Maudsley NHS Foundation Trust,<br>Briskman, Jackie; King's College London<br>Crawford, Mike; Imperial College London, Centre for Psychiatry<br>Foote, Lisa; McPin Foundation<br>Harris, Lucy; South London and Maudsley NHS Foundation Trust,<br>Boadu, Janet; King's College London<br>McCrone, Paul; King's College London,<br>McMurrin, Mary; University of Nottingham<br>Michelson, Daniel ; University of Sussex, School of Psychology<br>Moran, Paul; University of Bristol, Centre of Academic Mental Health,<br>School of Social and Community Medicine; University of Bristol<br>Mosse, Liberty; King's College London<br>Scott, Stephen; King's College London<br>Stahl, Daniel; Department of Biostatistics Institute of Psychiatry,<br>Psychology & Neuroscience (IoPPN), King's College London<br>Ramchandani, Paul; University of Cambridge<br>Weaver, Tim ; Middlesex University |
| <b>Primary Subject Heading</b>: | Mental health                                                                                                                                                                                                                                                                                                                                                                                                                                                                                                                                                                                                                                                                                                                                                                                                                                                                                                                                           |
| Secondary Subject Heading:      | Evidence based practice                                                                                                                                                                                                                                                                                                                                                                                                                                                                                                                                                                                                                                                                                                                                                                                                                                                                                                                                 |
| Keywords:                       | Personality disorders < PSYCHIATRY, Parenting, Child behaviour, Child & adolescent psychiatry < PSYCHIATRY                                                                                                                                                                                                                                                                                                                                                                                                                                                                                                                                                                                                                                                                                                                                                                                                                                              |
|                                 |                                                                                                                                                                                                                                                                                                                                                                                                                                                                                                                                                                                                                                                                                                                                                                                                                                                                                                                                                         |

SCHOLARONE™  
Manuscripts



I, the Submitting Author has the right to grant and does grant on behalf of all authors of the Work (as defined in the below author licence), an exclusive licence and/or a non-exclusive licence for contributions from authors who are: i) UK Crown employees; ii) where BMJ has agreed a CC-BY licence shall apply, and/or iii) in accordance with the terms applicable for US Federal Government officers or employees acting as part of their official duties; on a worldwide, perpetual, irrevocable, royalty-free basis to BMJ Publishing Group Ltd ("BMJ") its licensees and where the relevant Journal is co-owned by BMJ to the co-owners of the Journal, to publish the Work in this journal and any other BMJ products and to exploit all rights, as set out in our [licence](#).

The Submitting Author accepts and understands that any supply made under these terms is made by BMJ to the Submitting Author unless you are acting as an employee on behalf of your employer or a postgraduate student of an affiliated institution which is paying any applicable article publishing charge ("APC") for Open Access articles. Where the Submitting Author wishes to make the Work available on an Open Access basis (and intends to pay the relevant APC), the terms of reuse of such Open Access shall be governed by a Creative Commons licence – details of these licences and which [Creative Commons](#) licence will apply to this Work are set out in our licence referred to above.

Other than as permitted in any relevant BMJ Author's Self Archiving Policies, I confirm this Work has not been accepted for publication elsewhere, is not being considered for publication elsewhere and does not duplicate material already published. I confirm all authors consent to publication of this Work and authorise the granting of this licence.

# Randomised Feasibility Trial of the Helping Families Programme-Modified: An Intensive Parenting Intervention for Parents Affected by Severe Personality Difficulties

Crispin Day<sup>\*a</sup>, Jackie Briskman<sup>b</sup>, Mike J Crawford<sup>c</sup>, Lisa Foote<sup>d</sup>, Lucy Harris<sup>a</sup>, Janet Boadu<sup>e</sup>, Paul McCrone<sup>e</sup>, Mary McMurrans<sup>g</sup>, Daniel Michelson<sup>h</sup>, Paul Moran<sup>i</sup>, Liberty Mosse<sup>a</sup>, Stephen Scott<sup>j</sup>, Daniel Stahl<sup>k</sup>, Paul Ramchandani<sup>l</sup>, & Timothy Weaver<sup>m</sup>.

\*Corresponding author

<sup>a</sup> CAMHS Research Unit, Centre for Parent and Child Support, South London and Maudsley NHS Foundation Trust, Michael Rutter Centre, De Crespigny Park, London SE5 8AF, UK. Email: [crispin.1.day@kcl.ac.uk](mailto:crispin.1.day@kcl.ac.uk)

<sup>b</sup> Dept. of Psychology, Institute of Psychiatry, Psychology and Neuroscience, King's College London, De Crespigny Park, London SE5 8AF, UK.

<sup>c</sup> The Centre for Psychiatry, Imperial College London, 7th Floor Commonwealth Building, Hammersmith Hospital Campus, London W12 0NN, UK.

<sup>d</sup> McPin Foundation, 32-36 Loman St, London SE1 0EH, UK.

<sup>e</sup> King's Health Economics, P024 David Goldberg Centre, Institute of Psychiatry, Psychology & Neuroscience, King's College London, De Crespigny Park, London SE5 8AF, UK.

<sup>f</sup> Institute of Lifecourse Development, University of Greenwich

<sup>g</sup> Institute of Mental Health, University of Nottingham, Triumph Road, Nottingham, NG7 2TU, UK.

<sup>h</sup> School of Psychology, University of Sussex, Falmer, Brighton BN1 9QH

<sup>i</sup> Centre for Academic Mental Health, Department of Population Health Sciences, Bristol Medical School, University of Bristol, Bristol BS8 2BN, UK.

<sup>j</sup> Department of Child and Adolescent Psychiatry, Institute of Psychiatry, Psychology and Neuroscience, King's College London, De Crespigny Park, London SE5 8AF, UK.

<sup>k</sup> Department of Biostatistics, Institute of Psychiatry, Psychology and Neuroscience, King's College London, De Crespigny Park, London SE5 8AF, UK.

<sup>l</sup> PEDAL Research Centre, Faculty of Education, University of Cambridge, UK.

<sup>m</sup> Department of Mental Health, Social Work and Integrative Medicine, School of Health and Education, Middlesex University, The Burroughs, London NW4 4BT, UK.

# **Randomised Feasibility Trial of the Helping Families Programme-Modified: An Intensive Parenting Intervention for Parents Affected by Severe Personality Difficulties**

## **Abstract**

### **Background**

Specialist parenting intervention could improve coexistent parenting and child mental health difficulties of parents affected by severe personality difficulties.

### **Objective**

Conduct a feasibility trial of Helping Families Programme-Modified (HFP-M), a specialist parenting intervention.

### **Design**

Pragmatic, mixed-methods trial, 1:1 random allocation, assessing feasibility, intervention acceptability and outcome estimates.

### **Settings**

Two NHS health trusts and local authority children's social care.

### **Participants**

Parents: (i) primary caregiver, (ii) 18-65 years, (iii) severe personality difficulties, (iv) proficient English, and (v) capacity for consent. Child: (i) 3-11 years, (ii) living with index parent, and (iii) significant emotional/behavioural difficulties.

### **Intervention**

HFP-M: 16-session home-based intervention using parenting and therapeutic engagement strategies. Usual care: standard care augmented by single psychoeducational parenting session.

### **Outcomes**

1  
2  
3 Primary feasibility outcome: participant retention rate. Secondary outcomes: (i) rates of  
4 recruitment, eligibility and data completion, and (ii) rates of intervention acceptance,  
5 completion and alliance (Working Alliance Inventory-Short Revised). Primary clinical  
6 outcome: child behaviour (Eyberg Child Behavior Inventory). Secondary outcomes: child  
7 mental health (Concerns About My Child, Child Behavior Checklist-Internalising Scale),  
8 parenting (Arnold-O'Leary Parenting Scale, Kansas Parental Satisfaction Scale), and parent  
9 mental health (Symptom Checklist-27). Quantitative data were collected blind to allocation.  
10  
11  
12  
13  
14  
15

## 16 **Results**

17  
18 Findings broadly supported non-diagnostic selection criterion. Of 48 participants recruited,  
19 32 completed post intervention measures at mean 42 weeks later. Participant retention  
20 exceeded *a priori* rate (HFP-M=18; Usual care=14; 66.7%, 95% CI 51.6%-79.6%). HFP-M  
21 was acceptable, with delivery longer than planned. Usual care had lower alliance rating.  
22 Child and parenting outcome effects detected across trial arms with potential HFP-M  
23 advantage (ES range: 0.0-1.3).  
24  
25  
26  
27  
28  
29

## 30 **Conclusion**

31  
32 HFP-M is an acceptable and potentially effective specialist parenting intervention. A  
33 definitive trial is feasible, subject to consideration of recruitment and retention methods,  
34 intervention efficiency and comparator condition. Caution is required in interpretation of  
35 results due to reduced sample size. No serious adverse events reported.  
36  
37  
38  
39

## 40 **Trial registration**

41  
42 ISRCTN14573230  
43  
44  
45  
46  
47  
48  
49  
50  
51  
52  
53  
54  
55  
56  
57  
58  
59  
60

## Article Summary

### Strengths and Limitations of this Study

- This randomised trial assessed the feasibility of a specialist parenting intervention for coexistent mental health problems of parents affected by severe personality difficulties and their children.
- Findings provide useful evidence to support further evaluation of this specialist parenting intervention within a definitive trial, with modifications required to improve intervention efficiency, augmented usual care condition acceptability, and participant enrolment and retention.
- Caution is required in interpretation of results due to reduced sample size.
- The trial population's complex personality difficulties underline the importance of effective and sensitive management of trial consent procedures, random allocation and ongoing engagement of participants, particularly for those allocated to the usual care condition.

### Keywords

Child behaviour, parenting, child & adolescent psychiatry, personality disorder

### Funding

This work was supported by National Institute of Health Research, Health Technology Assessment, Project Reference Number: 12/194/01.

## Contributions of the Authors

Dr Crispin Day, Head, Centre for Parent and Child Support, South London and Maudsley NHS Foundation Trust and Head, CAMHS Research Unit, King's College, London, was the chief investigator and responsible for the overall conception, design, data acquisition, analysis, interpretation of findings at each phase of this research. He is responsible for the overall content of this report.

Ms Jackie Briskman, Department of Psychology, King's College, London, was the senior research trial coordinator and was responsible for data acquisition, analysis, interpretation, drafting findings and revising this report.

Professor Mike J. Crawford, Professor in Mental Health Research, Centre for Psychiatry, Imperial College, London was a co-applicant and contributed to the overall conception, design and interpretation of findings at each phase of this research. He provided an expert contribution about personality disorder. He contributed to critically revising this report.

Ms Lisa Foote, McPin Foundation, was a service user researcher and representative in this research. She contributed to the design, data acquisition, analysis, interpretation and drafting of findings. She contributed to critically revising this report.

Dr Lucy Harris, Deputy Head, Centre for Parent and Child Support, South London and Maudsley NHS Foundation Trust, was responsible for the development and revision of Helping Families Programme-Modified and supervised trial therapists. She contributed to critically revising this report.

Ms Janet Boadu is a researcher at King's Health Economics, King's College, London, co-conducted the health economic analysis and drafted findings for this report.

Professor Paul McCrone, Professor of Health Economics and Director of King's Health Economics, King's College, London, was a co-applicant and contributed to the overall conception, design and interpretation of findings at each phase of this research. He led the health economic component of the research and contributed to critically revising this report.

Professor Mary McMurrin, Professor at the Institute of Mental Health, University of Nottingham was a co-applicant and contributed to the overall conception, design and interpretation of findings at each phase of this research. She provided an expert contribution

1  
2  
3 about personality disorder. She was a member of the Manualisation Working Group,  
4 contributed to research therapist training and contributed to critically revising this report.  
5  
6

7 Dr Daniel Michelson, Senior Lecturer in Clinical Psychology, School of Psychology,  
8 University of Sussex, was a co-applicant and worked closely with the chief investigator on  
9 the overall conception and design of this research. He was senior research coordinator during  
10 the intervention development phase leading up to this trial and contributed to critically  
11 revising this report.  
12  
13  
14  
15

16 Professor Paul Moran, Professor of Psychiatry, Population Health Sciences, University of  
17 Bristol, was a co-applicant and contributed to the overall conception, design and  
18 interpretation of findings at each phase of this research. He provided an expert contribution  
19 about personality disorder. He contributed to research therapist training and critically revised  
20 this report.  
21  
22  
23  
24  
25

26 Ms Liberty Mosse, CAMHS Research Unit, King's College, London, was a researcher  
27 worker on this study. She was responsible for Phase 3 data acquisition, analysis and  
28 interpretation of findings. She completed the majority of qualitative data acquisition and led  
29 its analysis under the direction of the chief investigator. She contributed to critically revising  
30 this report.  
31  
32  
33  
34

35 Professor Stephen Scott, Professor of Child Health and Behaviour, King's College, London,  
36 was a co-applicant and contributed to the overall conception, design and interpretation of  
37 findings at each phase of this research. He provided an expert contribution about parenting  
38 and parenting programmes. He contributed to critically revising this report.  
39  
40  
41  
42

43 Dr Daniel Stahl, Reader in Biostatistics, Biostatistics and Health Informatics, King's College,  
44 London, was a co-applicant and contributed to the overall conception, design and  
45 interpretation of findings at each phase of this research. He provided an expert contribution  
46 to the design, analysis and interpretation of quantitative components of the research. He  
47 contributed to critically revising this report.  
48  
49  
50  
51

52 Professor Paul Ramchandani, LEGO Professor of Play in Education, Development and  
53 Learning, Faculty of Education, University of Cambridge, was a co-applicant and contributed  
54 to the overall conception, design and interpretation of findings at each phase of this research.  
55  
56  
57  
58  
59  
60



1  
2  
3 He provided an expert contribution about child mental health and co-ordinated the research in  
4 CNWL. He contributed to critically revising this report.  
5  
6

7 Dr Timothy Weaver, Associate Professor in Mental Health, Mental Health Social Work &  
8 Interprofessional Learning, Middlesex University, London, was a co-applicant and  
9 contributed to the overall conception, design and interpretation of findings at each phase of  
10 this research. He provided an expert contribution about qualitative design, data acquisition  
11 and interpretation. He contributed to critically revising this report.  
12  
13  
14  
15

### 16 **Manual and Data Availability**

17 All manuals can be obtained from the corresponding author. All data requests should be  
18 submitted to the corresponding author for consideration. Access to anonymised data may be  
19 granted following review.  
20  
21  
22  
23

### 24 **Acknowledgements**

25 We are indebted to the parents, practitioners, clinicians and service managers who worked  
26 with us on this trial, particularly Ruth Wilson. We would particularly like to thank Sarah  
27 Inkpen, Bethan Stevenson and Chelsea McCorry for their help with trial findings. Peter  
28 Fonagy and Philip Graham for overseeing the governance of the trial.  
29  
30  
31  
32  
33

### 34 **Competing Interests**

35 Dr Crispin Day is the lead developer of two parenting programmes used in this report:  
36 Helping Families Programme and Empowering Parents Empowering Communities.  
37  
38

39 Prof Mike Crawford has previously received research grant funding on behalf of Imperial  
40 College London from the National Institute for Health Research.  
41  
42  
43  
44

45 Dr Lucy Harris is a co-developer of the Helping Families Programme.  
46

47 Prof Mary McMurran was an author of the Psychoeducation plus Problems Solving (PEPS)  
48 intervention for adults with personality disorder. PEPS helped to inform the modified HFP.  
49  
50

51 Dr. Paul Moran reports personal fees from a talk given at 4th. Bergen International  
52 Conference on Forensic Psychiatry, 2016 Outside of the submitted work, Dr Moran led the  
53 development of the SAPAS, the personality disorder screen used in this study.  
54  
55  
56  
57  
58  
59  
60

## Introduction

Mental ill health is the largest cause of disability, with three-quarters of lifetime disorders starting during childhood.[1] Children of parents affected by severe personality difficulties are at particular risk due to the impact of parents' symptoms and associated impairment on parenting capacity.[2-4] Lack of evidence-based treatments, under-developed care pathways and stigma result in poorer immediate and longer-term child outcomes, increase intergenerational transmission of mental health difficulties and perpetuate social disadvantage.[5,6]

Severe personality difficulties, including personality disorders, affect over 4% of UK adults and 40% of mental health service users, at least one-quarter of whom are parents.[7,8] Per annum UK treatment costs exceed £70 million, with wider societal costs estimated at £8 billion per year.[9] Characterised by problematic interpersonal relationships, emotional dysregulation and poor impulse control, severe personality difficulties are associated with insensitive and intrusive interactions with offspring, family hostility, inconsistent and unpredictable family routines that undermine affectionate, stable, and responsive parenting required for healthy child development.[2-4] Affected parents are likely to suffer higher parenting stress and lower satisfaction, exacerbating underlying mental health difficulties.[10,11]

One in ten UK children suffer mental health disorders, with children of parents with severe personality difficulties at substantially higher risk of intergenerational transmission, most commonly behavioural disorders.[12,13] These childhood disorders are associated with academic failure, school exclusion, maltreatment, self-harm and gang affiliation, with increased life-time risk of comorbid mental and physical health conditions, drug misuse, offending and worklessness.[1,12,13] Annual UK public service costs for severe behavioural problems are estimated at £5,000 per child including £1,400 health costs. Lifetime estimated costs range from £85,000 (moderate case) to £260,000 (severe case).[14,15]

Concerted preventative and early intervention during pregnancy, infancy and childhood is warranted.[16] Effective care models for co-occurring child and parental mental health problems are significant health policy and research priorities.[17-19] Nevertheless, routine care is highly variable, generally focused on the needs of *either* the adult *or* the child,[17] resulting in under-identification, poor understanding of the interrelationship between child

1  
2  
3 and parent difficulties, and misattribution of parenting difficulties to adult mental health  
4 symptoms *per se*.<sup>[20]</sup> Affected parents can be reluctant to engage due to stigma, treatment  
5 scepticism and the interpersonal difficulties and adverse life circumstances associated with  
6 personality difficulties.<sup>[21]</sup>  
7  
8  
9

10  
11 Parenting and parent factors are central to much effective child mental health treatment and  
12 problem remediation. Parenting programmes are the recommended cost-effective treatment  
13 for child behaviour problems.<sup>[22,23]</sup> However, non-specialised parenting programmes, not  
14 specifically designed for parents affected by mental health difficulties, often result in poorer  
15 engagement, acceptability and outcomes.<sup>[24,25]</sup> Specialist interventions for some parental  
16 mental health conditions, such as depression, substance misuse and eating disorders, have  
17 demonstrated improved outcomes and reduced intergenerational transmission, by up to  
18 40%.<sup>[26,27]</sup> Specialist programmes for parents affected by personality difficulties are at an  
19 earlier stage of evidence production.  
20  
21  
22  
23  
24  
25

26  
27 Helping Families Programme-Modified (HFP-M) was developed as a specialist, intensive  
28 parenting intervention to address this need and service gap. It aims to improve immediate  
29 child and parenting outcomes with longer-term potential to reduce intergenerational  
30 transmission and psychosocial adversity within affected families.<sup>[4]</sup> Guided by  
31 recommended frameworks, HFP-M development synthesised two existing evidence-based  
32 interventions, incorporating relevant clinical practice recommendations and service user  
33 consultation.<sup>[22,28-33]</sup> Consistent with other promising programmes aiming to improve  
34 parenting and child outcomes in high risk groups, HFP-M is based on a transtheoretical  
35 model of parenting drawing on attachment, social learning and cognitive-affective theories  
36 and methods.<sup>[34,35]</sup> HFP-M does not target personality difficulties *per se* but aims to  
37 improve the ways that these characteristics affect parenting behaviour, emotional regulation,  
38 parent-child relationships and lead to adverse child outcomes.  
39  
40  
41  
42  
43  
44  
45  
46  
47

48  
49 HFP-M has three structured components [36]: (i) Core Therapeutic Process: including  
50 partnership and goal-based methods to promote collaborative relational engagement, shared  
51 formulation, empathic parent validation and crisis management;<sup>[36]</sup> (ii) Parent Groundwork:  
52 including emotion-focussed, cognitive, behavioural and interpersonal strategies to manage  
53 parental emotional dysregulation and hostility while relating to their children and undertaking  
54 parenting tasks, and (iii) Parenting Strategies: including consistent use of positive parenting  
55  
56  
57  
58  
59  
60

1  
2  
3 skills, such as, praise, consequences and limit setting, and relational and affective parenting  
4 methods such as emotionally responsive, warm care-giving and reflective function.  
5  
6

7  
8 Definitive trials require successful recruitment, retention, and intervention acceptability.[30,  
9 37-41] Participant retention underpins trial validity. Lower rates reduce power, undermine  
10 interpretation of findings and increase costs. HFP-M retention, and initial recruitment was  
11 expected to be affected by: (i) participants' core clinical features, (ii) greater exposure to  
12 family stress, negative life events, lower levels of social support and co-morbid mental health  
13 conditions, and (iii) under-identification of need within routine care, negative referrer  
14 expectancies, lower service engagement and attendance. These factors are reflected in  
15 evidence derived from 45 personality disorder treatments trials reported in two systematic  
16 reviews indicating a median participant non-completion rate of 35%.[42,43] Pre-feasibility  
17 trial case series findings, consultation with service user, clinicians and research ethics  
18 indicated that initial plans for trial recruitment based on personality disorder research  
19 diagnosis was unlikely to be viable for practical, participant acceptability and ethical  
20 reasons.[21]  
21  
22  
23  
24  
25  
26  
27  
28  
29

30 To be useful and effective in practice, interventions need to demonstrate both clinical efficacy  
31 and user acceptability. Acceptability refers to service user judgements across four inter-  
32 related domains of intervention satisfaction: (i) relevance, (ii) content and procedures, (iii)  
33 clinician/provider characteristics and (iv) outcome suitability. [39,40]  
34  
35  
36  
37

38 This study reports quantitative findings from a randomised feasibility trial of HFP-M, based  
39 on a published protocol.[4] The trial aimed to assess research and clinical feasibility of HFP-  
40 M for a target population with co-existing parent personality difficulties and child mental  
41 health difficulties with findings being used to inform the design of a full-scale trial.  
42  
43  
44

45 The primary feasibility outcome was a participant retention rate of at least 65% post-  
46 intervention. Secondary feasibility outcomes were rates of: (i) participant identification and  
47 recruitment, (ii) data collection, and (iii) intervention use, uptake and acceptability. Primary  
48 clinical outcome was child behaviour. Secondary clinical outcomes included parental child  
49 concerns, child internalising difficulties, parenting behaviour, satisfaction and psychological  
50 well-being. The trial sought to produce effect sizes and variance estimates for child and  
51 parent outcomes necessary to power a full-scale trial.  
52  
53  
54  
55  
56  
57  
58  
59  
60

1  
2  
3 The findings of a parallel qualitative process evaluation investigating the influence of  
4 contextual factors on trial and intervention implementation and outcome generation are  
5 published elsewhere, as are the full findings of preliminary intervention costs and estimates  
6 of cost-effectiveness.[44]  
7  
8  
9

## 10 11 **Method**

### 12 13 **Design**

14 Mixed-method, two-arm, parallel feasibility trial with random allocation in a 1:1 ratio to  
15 either: (i) HFP-M, or (ii) Usual care.  
16  
17

18 Quantitative data were collected at pre-randomisation baseline (Time 1), post-intervention  
19 (Time 2), six months from baseline, and follow-up (Time 3), 4-month, ten months from  
20 baseline.  
21  
22  
23  
24

### 25 26 **Eligibility criteria**

27 Parent: (i) primary parental caregiver for index child, (ii) aged 18-65, (iii) experiencing  
28 severe personality difficulties, assessed by self-administered Standardised Assessment of  
29 Personality-Abbreviated Scale (SAPAS) score of  $\geq 3$ , the optimal cut-point for the intended  
30 sample population,[45] (iv) proficient written and spoken English, and (v) capacity to provide  
31 informed consent.  
32  
33  
34  
35

36 Child: (i) aged 3-11, (ii) living with index parent, and (iii) experiencing significant  
37 emotional/behavioural difficulties, assessed by Strengths and Difficulties Questionnaire Total  
38 Score of  $\geq 17$ . [46]  
39  
40  
41

42 Exclusion criteria: Parent (i) co-existing psychosis, (ii) engagement in another structured  
43 parenting intervention, (iii) inpatient status, or (iv) insufficient language/cognitive abilities.  
44 Child (i) pervasive developmental disorder, (ii) not residing with index parent, or (iii)  
45 considered for/subject to child protection supervision.  
46  
47  
48  
49

### 50 51 **Interventions**

#### 52 53 *HFP-M Intervention*

54 16-session home-based 1:1 parenting intervention for parents with severe personality  
55 difficulties, including personality disorder. Session modules proceeded iteratively to (i)  
56 establish effective, validating collaborative partnership, (ii) develop shared understanding of  
57  
58  
59  
60

1  
2  
3 severe parental personality difficulties' impact on parenting, child functioning and family  
4 ecology, (iv) implement parent quick wins, parenting and child intervention goals, (v) use  
5 evidence-based parenting and parent self-care strategies to achieve agreed goals, and (vi)  
6 recurrent review of goals and therapeutic partnership. Six trial therapists received eight,  
7 three-hour, training sessions provided by HFP-M programme developers and clinical experts.  
8 Trial therapists completed structured checklists and received fortnightly supervision from  
9 experienced HFP-M clinicians to support clinical implementation and fidelity.

### 16 *Usual care*

17  
18 No systematised parenting pathway was typically provided for the participant population. To  
19 provide consistent, low intensity support, participants could receive an additional home-based  
20 one-to-one parent information and support session. Derived from the evidence-based  
21 Empowering Parents Empowering Communities parenting programme, [47] session content  
22 included: (i) brief exploration of parenting and child needs, family support, parent priorities  
23 and goals, and (ii) focus on one parent priority topic, selected from Being Good Enough,  
24 Listening to My Child, Praising My Child, Taking Care of Myself, Understanding My  
25 Child's Behaviour, My Child's Emotion or Playing Together. The additional session was  
26 delivered by three trained parent practitioners, who received ongoing supervision to support  
27 implementation and fidelity.

### 36 *Concomitant interventions*

37  
38 Both HFP-M and the single Usual care parent support session were provided in addition to  
39 existing medical, psychosocial and educational support and treatment services used by  
40 participating parents and their families. A joint-working protocol specified procedures for  
41 care co-ordination and information sharing between trial therapists and routine services.

## 45 **Measures**

### 48 *Participant characteristics*

49  
50 Descriptive data were collected on parent and child age, gender and ethnicity, family  
51 household composition, participant diagnostic status, and family socio-economic status. Data  
52 from EQ-5D,[48,49] provided information about parent and child health and disability.

### *Feasibility evaluation*

Structured record sheets, completed prospectively by research staff and trial therapists, documented: (i) participant identification and verbal consent, (ii) screening, eligibility, informed written consent, randomisation, and reasons for non-participation, and (iii) data collection and missing data.

### *Clinical outcomes*

- **Eyberg Child Behavior Inventory (ECBI)**,<sup>[50]</sup> a 36-item questionnaire assessing intensity and number of disruptive behaviour problems in 2-16 year-olds, providing a comprehensive measure of child behaviour difficulties. Intensity Scale score of  $\geq 131$  indicates significant severity. Problem Scale score of  $\geq 15$  indicates significant number of problems.
- **Concerns About My Child (CAMC)**,<sup>[47]</sup> a visual analogue scale (0-100) rating three parental concerns about their child. Concerns nominated at baseline were re-rated at each time point, providing a sensitive, individualised index of change.
- **Child Behavior Checklist-Internalising Scale (CBCL-Int)**,<sup>[51]</sup> a 32-item questionnaire assessing internalising problems in 6-18 year-olds, with an alternate 36-item version for children aged 1½-5 years. Standardised T-scores combine results from both versions. A score of  $\geq 60$  indicates clinical caseness.
- **Arnold-O'Leary Parenting Scale (PS)**,<sup>[52]</sup> a 30-item questionnaire assessing dysfunctional parental discipline behaviour for children aged 2-16 years, which correlates with more time-consuming observational ratings. A score of  $\geq 3.2$  differentiates clinic and non-referred children.
- **Kansas Parental Satisfaction Scale (KPSS)**,<sup>[53]</sup> a 3-item scale providing a brief measure of parenting stress and satisfaction.
- **Symptom Checklist-27 (SCL-27)**,<sup>[54]</sup> a 27-item questionnaire assessing psychological symptoms in adults that provides a Global Severity Index (GSI) of psychopathology.

### *Intervention acceptability:*

- **Working Alliance Inventory-Short Revised (WAI-SR)**,<sup>[55]</sup> a parent completed 12-item questionnaire assessing therapeutic relationship quality consisting of three subscales: (i) Goals, measuring agreement on intervention goals and outcomes, (ii)



1  
2  
3 Tasks, measuring agreement on behaviours and thoughts underpinning intervention  
4 process, and (iii) Bond, measuring mutual trust, acceptance and confidence.

- 5  
6  
7 • Structured worksheets recorded intervention uptake, attendance, retention, reasons for  
8 missed sessions and dropout.  
9

### 10 *Health economic:*

- 11  
12  
13  
14 • **Client Service Receipt Inventory (CSRI)**, [56] a schedule adapted to measure the  
15 use of services by caregivers and children.  
16  
17 • **EQ-5D-5L and EQ-5D-Y**, [48,49] a generic measure of health-related quality of life  
18 used to generate quality-adjusted life years. EQ-5D-Y is adapted for younger  
19 respondents.  
20  
21  
22

### 23 **Sample size**

24  
25 The primary feasibility criterion was post-intervention retention rate of at least 65% [42,43].  
26 A confidence interval approach was used to calculate a planned sample size of N=70.[57]  
27 Using a 95% CI for the proportion of parents who completed treatment and an expected  
28 completion rate of 80% based on previous evaluations of HFP, it was determined that an  
29 HFP-M intervention sample size of n=35 would provide a sufficiently precise estimate (95%  
30 CI .67-.93). A sample size of n=70 was also sufficient to obtain stable estimates of  
31 population variances for future power calculations.[58]  
32  
33  
34  
35  
36  
37

### 38 **Recruitment and consent procedures**

#### 39 *Settings*

40  
41  
42 Recruitment took place in two large UK NHS health services and concomitant local authority  
43 children's social care service in London (Site 1 and 2), located in areas of high mental health  
44 morbidity.  
45  
46  
47

#### 48 *Identification and consent*

49  
50 Clinical keyworkers undertook exploratory discussion and provided written information to  
51 potential participants. With consent, contact details were provided to researchers, who  
52 provided information about study aims, eligibility criteria, procedures, and a Participant  
53 Information Sheet. One week later, parents were contacted to determine participation and  
54 obtain written informed consent.  
55  
56  
57  
58  
59  
60



### *Allocation and randomisation*

Participants were allocated a unique, anonymised ID number and randomised to trial conditions between 11.05.16 and 29.03.17 by Clinical Trials Unit, King's College, London. Allocation was communicated confidentially to the trial co-ordinator, other researchers remained blind to allocation.

## **Data collection**

### *Screening and assessments*

Following consent, parents completed screening measures, and, when eligible, baseline measures in a standard sequence. Any parent discomfort was addressed sensitively and supportively. Persistent, non-intrusive efforts were used to complete post-intervention and follow-up data collection. Participants were reimbursed £10 per hour for data completion at each point.

## **Analysis**

Statistical analysis was mainly descriptive using means and standard deviations for continuous data, or medians and range where data were skewed. Frequencies and proportions were used to describe categorical variables. Feasibility of trial retention was assessed using the proportion of a predetermined parameter and estimated 95% CIs. Clinical outcomes were analysed using ANCOVA models to estimate likely range of intervention effect, by assessing 95% CI, at post-treatment, with pre-randomization values as a covariate.[59] Follow-up data were not included in these analyses due to a smaller sample than planned. Standardised effect sizes were calculated using Cohen's d. Given the complexity of coexistent parent and child mental health difficulties, the smallest change in outcome identified as clinically important is equivalent to a small effect size. Population variances for future power calculations were determined using the upper 80th percentile of confidence intervals around the estimated population variance.[59].

## **Patient and public involvement**

A senior staff member of a national service user organisation was a co-applicant and contributed to research conception, planning and governance. A service user researcher was involved in the analysis, interpretation and dissemination of findings. A service user panel

1  
2  
3 advised on trial planning, intervention methods, outcome selection and interpretation of  
4 findings.[60]  
5  
6  
7

## 8 **Independent ethical review and NHS research & development** 9 **approval**

10 Ethics approval was obtained from Health Research Authority South East Coast - Brighton &  
11 Sussex Research Ethics Committee (reference: 16/LO/0199). Research and development  
12 approvals were obtained from South London and Maudsley NHS Foundation Trust and  
13 Central and North-West London NHS Foundation Trust.  
14  
15  
16  
17  
18  
19

### 20 **Serious adverse events**

21 The chief investigator was responsible for reporting serious adverse events to the trial's  
22 independent Data Monitoring and Ethics Committee and responsible research ethics  
23 committee. No serious adverse events were reported.  
24  
25  
26  
27

## 28 **Results**

### 29 **Feasibility evaluation**

30 Recruitment took four months longer than planned due to delays in Site 2, resulting in a  
31 revised sample size of 48. Obtaining keyworker information on service users approached  
32 about trial participation proved impractical.  
33  
34  
35  
36  
37

38 All referred service users (n=89, 100.0%) consented to research contact (see Figure 1). Adult  
39 mental health services (AMHS) referred 30 (33.7%) parents, child and adolescent mental  
40 health services (CAMHS) 29 (32.6%), and children's social care (CSS) 30 (33.7%). Site 1  
41 referred sixty-five (73.0%) parents. Researchers made contact with 87 (97.7%) parents,  
42 requiring 1-13 communications per participant.  
43  
44  
45  
46  
47

48 Sixty (69.7%) parents met initial criteria and completed screening. The most common reason  
49 for ineligibility was parents declining trial participation (n=12, 13.5%). Six parents were  
50 excluded due to child-related reasons, most commonly presence of child developmental  
51 disorder.  
52  
53  
54

55 Forty-eight consenting participants met parent and child screening criteria, all of whom  
56 completed baseline measures, representing 80.0% of screened parents, 53.9% of referred  
57  
58  
59  
60

1  
2  
3 parents and 68.8% of the planned sample. Five (8.3%) met neither parent nor child screening  
4 criteria, four (6.7%) did not meet SAPAS criterion, and three (5.0%) did not meet SDQ  
5  
6 criterion.  
7

8  
9 Thirty-six (75.0%) participants were from Site 1, exceeding the site recruitment target. Site 2  
10 recruitment (n=12) was 34.3% of that planned, due to delayed recruitment and lower service  
11 engagement. Eighteen (37.5%) participants were referred by AMHS, 16 (33.3%) CAMHS  
12 and 14 (29.2%) CSS.  
13  
14

15  
16 There was a significant difference in trial condition uptake (HFP-M: n=21, 87.5%; Usual care  
17 n=15, 62.5%;  $\chi^2=4.0$ ,  $df=1$  (48),  $p<0.05$ ). Modal duration between randomisation and  
18 starting HFP-M was 2 weeks (range 1-23 weeks). Parents declined HFP-M because one gave  
19 birth, another was in couple conflict about participation, and a third did not respond to  
20 persistent contact (see Figure 1). The modal duration before Usual care parenting session  
21 receipt was 5.5 weeks (range 1-17 weeks). The most common reason for declining the  
22 additional Usual care parenting session was that participants hoped to be allocated to HFP-M.  
23  
24

25  
26 Thirty-two (66.7%, 95% CI 51.6% to 79.6%) participants completed post-intervention  
27 measures. The majority of participants who did not take up the intervention offered, mainly  
28 in the Usual care condition, did not complete post-intervention measures.  
29  
30

31  
32 Twenty-one (65.6%) parents completing post-intervention measures were also assessed at  
33 follow-up, representing 43.8% of all participants. Post-intervention measures were  
34 completed a mean of 42.0 weeks (SD 14.6) after baseline, due to HFP-M delivery being  
35 lengthier in duration than planned. Follow-up measures were completed a mean of 20 weeks  
36 (SD 8.9) later. Researchers required one to eight participant contacts to arrange post-  
37 intervention and follow-up data collection. Main reasons for non-completion included unable  
38 to contact participant, participant declining completion, and participant health and life  
39 circumstances.  
40  
41

42  
43 There were less than 0.1% missing data items across clinical measures at each time point.  
44  
45  
46  
47  
48  
49

## 50 51 52 **Sample characteristics**

### 53 54 *Demographic characteristics*

55  
56 All 48 participants were the biological parent of the index child, one was a father (2.1%) (see  
57 Table 1). The majority were lone parents (n=31, 67.4%), mean age, 34.9 (SD 7.1) years. The  
58  
59

majority (n=28, 61.0%) were White British/White, with fewer Black/Black British (n=9, 19.6%) and Dual Heritage (n=6, 13.5%) parents. English was the most common first language (n=44, 91.7%). Twenty-five (55.6%) participants completed education at 18 years or younger. Four participants (8.9%) were higher education graduates.

Most participants (n=37, 80.4%) were not in paid employment. Nine (19.5%) had partners in paid employment, predominantly part-time (n=7, 15.2%). No parent was in paid employment in 30 (65.2%) households. Twenty-five (86.2%) parents had received a formal psychiatric diagnosis, mean time since initial diagnosis was 9.7 (7.4) years.

Twenty-six (54.2%) children were male, mean age of 7.8 (SD 2.2) years. Median number of children in the home was 2, range 1-5 (see Table 1). Participants reported significant difficulties with anxiety/depression, pain/discomfort, with a smaller proportion experiencing difficulties in undertaking everyday activities (see Table 1).

### *Clinical characteristics*

Over eighty per cent of ECBI Problem and Intensity scores at baseline exceeded the clinical caseness cut-off, with similar caseness rates for CBCL-Int and PS (see Table 2). The most common baseline CAMC child-related parent concerns were conduct, self-regulation, parent-child relationships and emotional distress (see Table 3).

## **Trial interventions acceptability**

### *HFP-M attendance*

Of 21 participants who accepted HFP-M, 13 (61.9%, 95% CI 38.4% to 81.9%) completed HFP-M within the trial period. Six (28.6%, 95% CI 11.3% to 52.2%) withdrew before completion due to acute adult mental health crisis and complex family circumstances unrelated to HFP-M receipt. Recruitment delay and longer than anticipated intervention duration resulted in two (9.5%, 95% CI 1.2% to 30.4%) participants not fully completing HFP-M before trial conclusion. The mean number of HFP-M appointments offered was 15.8 (SD 7.7) and mean number attended was 11.2 (SD 6.3). HFP-M appointment attendance was 70.2%. Mean duration of HFP-M delivery was 28.4 (SD 21.7) weeks.

### *HFP-M therapeutic alliance acceptability*

Eighteen (85.3%) HFP-M participants completed post-intervention WAI-SR (mean total score=73.8, SD 10.4). Mean subscale scores were consistently in the upper end of the scale

(Mean Tasks Subscale score=24.9, SD 3.5; Bond Subscale score=24.9, SD 3.9; Goals Subscale score=23.9, SD 4.1).

### *Usual Care*

All 15 participants accepting the additional parenting session completed. Due to lower retention, only six participants provided post-intervention WAI-SR data (mean total score=56.2, SD 18.8). Mean subscales scores were consistently lower than the HFP-M condition (Mean Tasks Subscale score=17.4, SD 7.2; Bond Subscale score=19.8, SD 7.1; Goals Subscale score=19.0, SD 7.6).

There appeared to be a substantial difference in WAI-SR scores between the two conditions but there was insufficient Usual care data to test for a statistical difference.

No adverse events were reported during the trial. Participant intervention withdrawal most frequently occurred due to deterioration in participant mental health and life circumstances, unrelated to trial participation.

### **Clinical outcomes**

There were estimated mean improvements from baseline scores across a number of outcomes within both trial conditions (see Table 4). HFP-M mean differences exceeded those in Usual care on several outcomes. These findings should be treated with caution given the wide confidence intervals.

Estimated effect sizes showed a general post-intervention advantage for HFP-M on a range of outcomes. Medium effects for child behavioural problem severity (ECBI Intensity, ES 0.4, CI -0.3-1.1), and parenting satisfaction (KPSS, ES 0.4, CI -0.3-1.1) were detected and a large effect for parent-reported reductions in concerns about their child (CAMC Problem 1, ES 1.2, CI 0.4-2.0, CAMC Problem 2, ES 1.3, CI 0.5-2.1). No effects were detected for parenting behaviour and adult mental health. Descriptive scrutiny of follow-up findings showed that outcome scores across both groups were generally maintained or continued to improve.

Estimates of standard deviation and upper confidence intervals (u80% CI) for future power calculations of main clinical outcomes are: ECBI Problem: SD 6.7 (u80%CI: 7.6), ECBI Intensity SD 33.6 (u80%CI: 37.1), CAMC Problem 1: SD 15.3 (u80%CI: 17.4), and KPSS: 3.0 (u80%CI: 3.3).

## Health economic findings

Details of the health economic analyses are provided in full in Day et al. At Time 2, CSRI data were available for 26 cases and 19 at Time 3. CSRI Time 2 data revealed that the services most used by caregivers included GPs, psychiatrists, other medics and social workers. Caregivers were often in receipt of medication. Children were frequently in contact with school nurses, dentists, opticians, and GPs. EQ-5D-5L data were available for 36 caregivers at Time 1, 32 at Time 2 and 21 at Time 3. EQ-5D-Y data were available for 38, 31 and 20 children at each of the respective time points.

## Conclusion

This study assessed feasibility, potential challenges and decision-making for a definitive HFP-M trial.[28-30,39] Participant identification methods were successful across a wide range of mental health and CSS teams, over 90% of referred parents met dual child and parent screening criteria. Non-diagnostic eligibility criteria were acceptable and effective in recruiting an appropriate, multi-morbid sample.[61,62] Negative life events and disrupted family functioning, characteristic of the sample population, commonly delayed screening, data collection and intervention delivery.[7] Nevertheless, participant retention exceeded the *a priori* primary feasibility criterion of 65%. Participants declining intervention conditions were less likely to be retained at follow-up. Participant recruitment was slower than planned, mainly due to operational difficulties in one site.

Participants' multi-morbid characteristics are commonly associated with poorer treatment engagement and outcomes.[63,64] Intervention uptake differed substantially between trial conditions. HFP-M was largely acceptable to participants but delivery was less efficient than planned, often due to parents' life circumstances. The augmented Usual care condition appeared to be less acceptable, and potentially affected participant retention. Lower Usual care retention and acceptability rates may reflect common dissatisfaction associated with control condition allocation.[65,66]

Clinical effects were detected across trial conditions, with potential advantage for child behaviour, parental child concerns and parenting satisfaction for HFP-M. These are welcome given the population's complex parenting impairments and negative treatment expectancies.[2,64] The final sample size limited trial power and consequently affected

1  
2  
3 interpretation of results. A definitive trial could potentially narrow child selection criteria to  
4 include only behaviour problems as parenting programmes have a stronger evidence base for  
5 this condition. Alternatively, HFP-M content may require strengthening specifically in  
6 relation to child internalising difficulties. Economic findings indicated potential cost  
7 advantages for HFP-M over usual care.[44] However, CSRI completion rates were not high  
8 and a simpler version may be required in a larger trial.  
9

10  
11  
12  
13  
14 Trial conditions may have differed in duration, location and therapeutic intensity, potentially  
15 accounting for outcome and acceptability differences. Data collection relied on parent self-  
16 report, which is conventional given poor reliability of child-report across the age group and  
17 costs associated with independent ratings. Trial therapists provided self-report intervention  
18 fidelity data and supervision examined therapist HFP-M skills and implementation.  
19

20  
21  
22  
23 Independent methods could strengthen validity of fidelity monitoring in a definitive trial,  
24 including observational and video methods.  
25

26  
27  
28  
29 A definitive trial is potentially feasible and should be based on the assumption of a medium  
30 effect size for the primary outcome of child behaviour. Site engagement, resource allocation  
31 and keyworker training in participant identification and recruitment will be crucial to  
32 enrolment of the larger sample required in a future trial. Embedded researchers assisting in  
33 caseload identification and direct parent recruitment, not possible in this feasibility study,  
34 may promote enrolment. Participant retention, particularly parents allocated to a usual care  
35 condition, will continue to be challenging for a full trial. The population's complex  
36 personality difficulties and, typically, heightened sensitivity to rejection, underline the  
37 importance of managing sensitively and effectively trial consent procedures, the emotional  
38 and practical consequences of random allocation and proactively maintaining communication  
39 and validating relationships with participants throughout trial duration, particularly for those  
40 allocated to usual care. Though not routinely available, the usual care condition could be  
41 augmented with an on-going parent support group to potentially increase equipoise, face  
42 validity and uptake, which may also benefit trial retention.  
43  
44  
45  
46  
47  
48  
49  
50

51  
52  
53  
54  
55  
56  
57  
58  
59  
60  
HFP-M clinical and trial efficiency may be improved with more explicit, validating  
discussion with participants about the potential impact of life and personal circumstances on  
attendance, use of pre-emptive cancellation plans, and inclusion of inter-session contact using  
digital technology.[31,64,67]



Figure 1: CONSORT diagram randomised feasibility trial recruitment and retention

Word count: 4187

For peer review only

1  
2  
3  
4  
5  
6  
7  
8  
9  
10  
11  
12  
13  
14  
15  
16  
17  
18  
19  
20  
21  
22  
23  
24  
25  
26  
27  
28  
29  
30  
31  
32  
33  
34  
35  
36  
37  
38  
39  
40  
41  
42  
43  
44  
45  
46  
47  
48  
49  
50  
51  
52  
53  
54  
55  
56  
57  
58  
59  
60



## References

- [1] Fergusson, D., Horwood, L. & Ridder, E. (2005). Show me the child at seven: The consequences of conduct problems in childhood for psychosocial functioning in adulthood. *J Child Psychol Psyc*, 46, 837-849.
- [2] Petfield, L., Startup, H., Droscher, H. & Cartwright-Hatton, S. (2015) Parenting in mothers with borderline personality disorder and impact on child outcomes. *Evid Based Ment Health*, 18(3), 67-75.
- [3] Eyden, J., Winsper, C., Wolke, D., Broome, M. & MacCallum, F. (2016). A systematic review of the parenting and outcomes experienced by offspring of mothers with borderline personality pathology: Potential mechanisms and clinical implications. *Clin Psychol Rev*, 47, 85–105.
- [4] Day, C., Harris, L., McCrone, P., McMurrin, M., Moran, P., Morgan, L. et al. (2017) Feasibility trial of a psychoeducational intervention for parents with personality difficulties: The Helping Families Programme. *Contemporary Clinical Trials Communications*, 8, 67-74. doi.org/10.1016/j.conctc.2017.08.002.
- [5] Ackerson, B. (2003). Coping with the dual demands of severe mental illness and parenting: The parents' perspective. *Fam Soc*, 84, 109-119.
- [6] Newton-Howes, G., Weaver, T. & Tyrer, P. (2008). Attitudes of staff towards patients with personality disorder in community mental health teams. *Aust NZ J P Psychiat*, 42, 572-577.
- [7] Coid, J., Yang, M., Tyrer, P. & Roberts, A. (2006). Prevalence and correlates of personality disorder in Great Britain. *Brit J Psychiat*, 188, 423-431.
- [8] Newton-Howes, G., Tyrer, P., Anagnostakis, K., Cooper, S., Bowden-Jones, O. & Weaver, T. (2010). The prevalence of personality disorder, its comorbidity with mental state disorders, and its clinical significance in community mental health teams. *Soc Psych Psych Epid*, 45, 453-460.
- [9] McCrone, P., Patel, A., Knapp, M. & Lawton-Smith, S. (2008). *Paying the price: The cost of mental health care in England to 2026*. London: King's Fund. Available at:

1  
2  
3  
4 [http://www.kingsfund.org.uk/sites/files/kf/Paying-the-Price-the-cost-of-mental-health-care-](http://www.kingsfund.org.uk/sites/files/kf/Paying-the-Price-the-cost-of-mental-health-care-England-2026-McCrone-Dhanasiri-Patel-Knapp-Lawton-Smith-Kings-Fund-May-2008_0.pdf)  
5 [England-2026-McCrone-Dhanasiri-Patel-Knapp-Lawton-Smith-Kings-Fund-May-](http://www.kingsfund.org.uk/sites/files/kf/Paying-the-Price-the-cost-of-mental-health-care-England-2026-McCrone-Dhanasiri-Patel-Knapp-Lawton-Smith-Kings-Fund-May-2008_0.pdf)  
6 [2008\\_0.pdf](http://www.kingsfund.org.uk/sites/files/kf/Paying-the-Price-the-cost-of-mental-health-care-England-2026-McCrone-Dhanasiri-Patel-Knapp-Lawton-Smith-Kings-Fund-May-2008_0.pdf)  
7

8  
9 [10] Johnson, J., Cohen, P., Kasen, S., Ehrensaft, M. & Crawford, T. (2006). Associations of  
10 parental personality disorders and axis I disorders with childrearing behavior. *J Am Acad*  
11 *Child Psy*, 69, 336-350.  
12

13  
14 [11] Newman, L., Stevenson, C., Bergman, L. & Boyce, P. (2007). Borderline personality  
15 disorder, mother-infant interaction and parenting perceptions: Preliminary findings. *Aust NZ J*  
16 *Psychiat*, 41, 598-605.  
17

18  
19 [12] Green, H., McGinnity, A., Meltzer, H., Ford, T. & Goodman, R. (2005). *Mental health*  
20 *of children and young people in Great Britain, 2004*. Basingstoke: Palgrave Macmillan.  
21 Available at: <http://www.esds.ac.uk/doc/5269/mrdoc/pdf/5269technicalreport.pdf>  
22

23  
24 [13] Davis, H., Day, C., Cox, A. & Cutler L. (2000). Child and adolescent mental health  
25 needs assessment and service implications in an inner-city area. *Clin Child Psychol P*, 5, 169-  
26 188.  
27

28  
29 [14] Romeo R, Knapp M. & Scott S. (2006). Economic cost of severe antisocial behaviour in  
30 children and who pays it. *Br J Psychiatry*, 188(6):547–553.  
31

32  
33 [15] Parsonage M, Khan L. & Saunders (2014). *Building a better future: The lifetime costs of*  
34 *childhood behavioural problems and the benefits of early intervention*. Lond Cent  
35  
36  
37  
38  
39  
40  
41  
42  
43  
44  
45  
46  
47  
48  
49  
50  
51  
52  
53  
54  
55  
56  
57  
58  
59  
60  
Ment Health.

[16] Sved Williams, A., Yelland, C., Hollamby, S., Wigley, M. & Aylward, P. (2018) A new  
therapeutic group to help women with borderline personality disorder and their infants. *J*  
*Psychi Prac*, 24 (5): 331-340.

[17] Department of Health, Department for Education (2017). *Transforming Children and*  
*Young People's Mental Health Provision: A Green Paper*. London: DoH/DfE.

[18] Social Care Institute for Excellence (2011) Think child, think parent, think family: a  
guide to parental mental health and child welfare.

<https://www.scie.org.uk/publications/guides/guide30/summary.asp>. Last accessed 31.05.18.

- 1  
2  
3 [19] Mental Health Taskforce (2016). The Five Year Forward View of Mental Health.  
4 Mental Health taskforce. Available at: [www.england.nhs.uk/mentalhealth/taskforce](http://www.england.nhs.uk/mentalhealth/taskforce). Last  
5 accessed 22.11.18  
6  
7  
8  
9 [20] Parker, G., Beresford, B., Clarke, S. et al (2008). *Technical report for SCIE Research*  
10 *Review on the prevalence and incidence of parental mental health problems and the*  
11 *detection, screening and reporting of parental mental health problems*. Working Paper No.  
12 SCIE 2247: University of York.  
13  
14  
15  
16  
17 [21] Wilson, R., Weaver, T., Michelson, D. & Day, C. (2018) Experiences of parenting and  
18 clinical intervention for mothers affected by personality disorder: a pilot qualitative study  
19 combining parent and clinician perspectives. *BMC Psychiatry*, 18,152.  
20 doi.org/10.1186/s12888-018-1733-8.  
21  
22  
23  
24  
25 [22] National Institute for Health and Clinical Excellence (2013). *Antisocial behaviour and*  
26 *conduct disorders in children and young people: Recognition, intervention and management*.  
27 London: NICE.  
28  
29  
30  
31 [23] Michelson, D., Day, C., Dretzke., Davenport, C. & Barlow, J. (2013) Do evidence-based  
32 interventions work when tested in the "real world?" A systematic review and meta-analysis  
33 of parent management training for the treatment of child disruptive behavior. *Clin Child Fam*  
34 *Psych*, 16(1), 18-34.  
35  
36  
37  
38 [24] Reyno, S. & McGrath, P. (2006). Predictors of parent training efficacy for child  
39 externalizing behavior problems: A meta-analytic review. *J Child Psychol Psyc*, 47, 99-111.  
40  
41  
42 [25] Lundahl, B., Risser, H. J., & Lovejoy, M. C. (2006). A meta-analysis of parent training:  
43 Moderators and follow-up effects. *Clin Psychol Rev*, 26(1), 86-104.  
44  
45  
46  
47 [26] Dawe, S., & Harnett, P. (2007). Improving family functioning in methadone maintained  
48 families: Results from a randomised controlled trial. *J Subst Abuse Treat*, 32, 381-390.  
49  
50  
51  
52 [27] Thanhäuser M, Lemmer G, de Girolamo G, & Christiansen H. (2017) Do preventive  
53 interventions for children of mentally ill parents work? Results of a systematic review and  
54 metanalysis. *Curr Opin Psychiatry*, 30(4):283–299.  
55  
56  
57 [28] Craig, P., Dieppe, P., Macintyre, S., Michie, S., Nazareth, I. & Petticrew, M. (2008).  
58  
59  
60

1  
2  
3  
4  
5  
6  
7  
8  
9  
10  
11  
12  
13  
14  
15  
16  
17  
18  
19  
20  
21  
22  
23  
24  
25  
26  
27  
28  
29  
30  
31  
32  
33  
34  
35  
36  
37  
38  
39  
40  
41  
42  
43  
44  
45  
46  
47  
48  
49  
50  
51  
52  
53  
54  
55  
56  
57  
58  
59  
60

*Developing and evaluating complex interventions: New guidance.* London: Medical Research Council.

[29] Hoffman, T., Glasziou, P., Boutron, I., Milne, R., & Perera, R. (2014). Better reporting of interventions: Template for intervention description and replication (TIDieR) checklist and guide. *Brit Med J*, 348:g1687

[30] Eldridge, S., Chan, C., Campbell, M., Bond, C., Hopewell, S., Thabane, L et al. (2016). CONSORT 2010 statement: extension to randomised pilot and feasibility trial *Pilot Feasibility Stud*, 2:64.

[31] Bateman, A. W., & Fonagy, P. (2000). Effectiveness of psychotherapeutic treatment of personality disorder. *Brit J Psychiat*, 177(2), 138-143.

[32] McMurrin, M., Crawford, M. J., Reilly, J.G., McCrone, P., Moran, P., Williams, H., et al. (2011). Psycho-education with problem solving (PEPS) therapy for adults with personality disorder: A pragmatic multi-site community-based randomised clinical trial. *Trials*, 12, 198.

[33] Day, C., Kowalenko, S., Ellis, M., Dawe, S., Harnett, P. & Scott, S. (2011). The Helping Families Programme: A new parenting intervention for children with severe and persistent conduct problems. *Child Adol Ment H-UK*, 16, 167-171.

[34] Harnett, P. & Dawe, S. (2008). Reducing Child Abuse Potential in Families Identified by Social Services: Implications for Assessment and Treatment. *Brief Treatment and Crisis Intervention*, 8(3), 226–235.

[35] Gray, A. Townsend, M. Bourke, M. & Grenyer, B. (2018) Effectiveness of a brief parenting intervention for people with borderline personality disorder: a 12-month follow-up study of clinician implementation in practice, *Advances in Mental Health*, 17:1, 33-43, doi: 10.1080/18387357.2018.1464887

[36] Day, C., Ellis, M. & Harris. (2015). *Family Partnership Model Reflective Practice Handbook*. 2<sup>nd</sup> Edn. South London & Maudsley NHS Foundation Trust/King's College, London.

[37] McMurrin, M., Huband, N. & Overton, E. (2010). Non-completion of personality disorder treatments: A systematic review of correlates, consequences, and interventions. *Clin Psychol Rev*, 30, 277-287

- 1  
2  
3  
4 [38] Tetley, A., Jinks, M., Huband, N., Howells., K & McMurrans, M. (2012). Barriers to and  
5 facilitators of treatment engagement for clients with personality disorder: A Delphi survey.  
6 *Personal Ment Health*, 6, 97-110.  
7  
8  
9 [39] Kazdin AE. (1980) Acceptability of alternative treatments for deviant child behavior. *J*  
10 *Appl Behav Anal.*, 13(2):259–273.  
11  
12  
13 [40] Foster SL, Mash EJ. (1999) Assessing social validity in clinical treatment research:  
14 Issues and procedures. *J Consult Clin Psychol.*, 67(3):308.  
15  
16  
17 [41] Bugge, C., Williams, B., Hagen, S., Logan, J., Glazener, C., Pringle, S., et al. (2013). A  
18 process for Decision-making after Pilot and feasibility Trials (ADePT): development  
19 following a feasibility study of a complex intervention for pelvic organ prolapse. *Trials*,  
20 14:353. doi: 10.1186/1745-6215-14-353. PubMed.  
21  
22  
23 [42] Oud M, Arntz A, Hermens ML, Verhoef R, Kendall T. (2018) Specialized  
24 psychotherapies for adults with borderline personality disorder: A systematic review and  
25 meta-analysis. *Aust N Z J Psychiatry.*; 52(10):949–961.  
26  
27  
28 [43] McMurrans M, Huband N, Overton E. (2010) Noncompletion of personality disorder  
29 treatments: A systematic review of correlates, consequences, and interventions. *Clin Psychol*  
30 *Rev.*, 30(3):277–287.  
31  
32  
33 [44] Day C, Briskman J, Crawford MJ, Foote L, Harris L, Boadu J, et al. Helping Families  
34 Programme-Modified: Development of a Specialised Parenting Intervention for Parents  
35 Affected by Severe Personality Difficulties and Randomised Feasibility Trial. *Health Technol*  
36 *Assess. Accepted for publication.*  
37  
38  
39 [45] Moran, P., Leese, M., Lee, T., Walters, P., Thornicroft, G. & Mann, A. (2003). The  
40 Standardised Assessment of Personality - Abbreviated Scale (SAPAS): Preliminary  
41 validation of a brief screen for personality disorder. *Brit J Psychiat*, 183, 228-232.  
42  
43  
44 [46] Goodman, R., Ford, T., Richards, H., Gatward, R. & Meltzer, H. (2000). The  
45 Development and Well-Being Assessment: Description and initial validation of an integrated  
46 assessment of child and adolescent psychopathology. *J Child Psychol Psyc*, 41, 645-655.  
47  
48  
49  
50  
51  
52  
53  
54  
55  
56  
57  
58  
59  
60

- 1  
2  
3  
4 [47] Day, C., Michelson, M., Thomson, S., Penney, C. & Draper, L. (2012). Evaluation of a  
5 peer-led parenting intervention for child behaviour problems: A community-based  
6 randomised controlled trial. *Brit Med J*, 344, e1107.  
7  
8  
9 [48] van Reenen, M. & Janssen, B. (2015). *EQ-5D-5L User Guide*. Available at:  
10 [https://euroqol.org/wp-content/uploads/2016/09/EQ-5D-5L\\_UserGuide\\_2015.pdf](https://euroqol.org/wp-content/uploads/2016/09/EQ-5D-5L_UserGuide_2015.pdf) [Accessed  
11 29 May 2018].  
12  
13  
14  
15 [49] Wille, N., Badia, X., Bonsel, G., Burstro, K., Cavrini, G., Develin, N., et al. (2010).  
16 Development of the EQ-5D-Y: A child-friendly version of the EQ-5D. *Qual Life Res*, 19 (6),  
17 875-86.  
18  
19  
20  
21 [50] Eyberg, S. & Ross, A.W. (1978). Assessment of child behaviour problems: The  
22 validation of a new inventory. *J Clin Child Psychol*, 7:2, 113-116,  
23 *doi:10.1080/15374417809532835*  
24  
25  
26  
27 [51] Achenbach, T. & Rescorla, L. (2001). *Manual for the ASEBA School-Age Forms and*  
28 *Profiles*. Burlington, VT: University of Vermont, Research Center for Children, Youth &  
29 Families.  
30  
31  
32  
33 [52] Arnold, D., O'Leary, S., Wolff, L. & Acker, M. (1993). The Parenting Scale: A measure  
34 of dysfunctional parenting in discipline situations. *Psychol Assessment*, 5, 137-144.  
35  
36  
37 [53] James, D., Schumm, W., Kennedy, C., Grigsby, C., Sheckman, K. & Nichols, C. (1985).  
38 Characteristics of the Kansas parental satisfaction scale among two samples of married  
39 parents. *Psychol Rep*, 57, 163-169.  
40  
41  
42  
43 [54] Müller, J., Postert, C., Beyer, T., Furniss, T. & Achtergarde, S. (2010). Comparison of  
44 eleven short versions of the Symptom Checklist 90-Revised (SCL-90-R) for use in the  
45 assessment of general psychopathology. *Psychol Assessment*, 32, 246-254.  
46  
47  
48  
49 [55] Hatcher, R., & Gillaspay, J. (2006). Development and validation of a revised short  
50 version of the Working Alliance Inventory. *Psychother Res*, 16, 12-25.  
51  
52  
53 [56] Beecham J, Knapp M. Costing psychiatric interventions. In Thornicroft G (ed)  
54 *Measuring Mental Health Needs*. London, Gaskell.  
55  
56  
57  
58  
59  
60

- 1  
2  
3 [57] Hertzog, M. (2009). Considerations in determining sample size for pilot studies. *Res*  
4 *Nurs Health*, 31, 180-191.  
5  
6  
7 [58] Browne, R. (1995). On the use of a pilot sample for sample size determination. *Stat Med*,  
8 14, 1933-1940.  
9  
10  
11 [59] Brown, H. & Prescott. R. (2007). *Applied Mixed Models in Medicine. Second Edition*.  
12 New York: John Wiley & Sons.  
13  
14  
15  
16 [60] INVOLVE (2010). *Payment for Involvement: A guide for making payments to members*  
17 *of the public actively involved in NHS, public health and social care research*. INVOLVE:  
18 Eastleigh.  
19  
20  
21  
22 [61] McMurrin, M., Delpont, J., Wood, K., Jenkins, S., Wall, M. & Day, F. (2012).  
23 Recruitment to personality disorder treatment trials. *MHRJ*, 17, 119-128.  
24  
25  
26 [62] Stines, L. & Feeny, N. (2008) Unique ethical concerns in clinical trials comparing  
27 psychosocial and psychopharmacological interventions. *Ethics Behav*, 18:2-3, 234-246, doi:  
28 10.1080/10508420802064333  
29  
30  
31  
32 [63] Cooper, A & Conklin, L (2015) Dropout from individual psychotherapy for major  
33 depression: A meta-analysis of randomized clinical trials. *Clin Psychol Rev*, 40 57–65  
34  
35  
36 [64] Barnicot, K., Katsakou, C., Marougka, S. & Priebe, S. (2011) Treatment completion in  
37 psychotherapy for borderline personality disorder – a systematic review and meta-analysis.  
38 *Acta Psychiat Scand*, 123: 327–338  
39  
40  
41  
42 [65] Lindström, D., Sundberg-Petersson, I., Adami, J. & Tønnesen, H. (2010)  
43 Disappointment and drop-out rate after being allocated to control group in a smoking  
44 cessation trial. *Contemp Clin Trials*, 1, 22-6. doi: 10.1016/j.cct.2009.09.003.  
45  
46  
47  
48 [66] Cook T. & Campbell, D. (1979) *Quasi-experimentation: Design and Analysis Issues for*  
49 *Field Settings*. Chicago, Rand McNally.  
50  
51  
52 [67] McMain, S., Boritz, T., & Leybman, M. (2015). Common strategies for cultivating a  
53 positive therapy relationship in the treatment of borderline personality disorder. *J Psychother*  
54 *Integr*, 25(1), 20-29.  
55  
56  
57  
58  
59  
60



**Table 1: Participant demographic characteristics**

| Demographic characteristics                                   |                                              | Baseline (Time 1) |              |            |
|---------------------------------------------------------------|----------------------------------------------|-------------------|--------------|------------|
|                                                               |                                              | Total             | Intervention | Usual Care |
| Parent gender (Female) (n, %)                                 |                                              | 47 (97.9)         | 24 (100.0)   | 23 (95.8)  |
| Parent age (yrs.)(mean, SD)                                   |                                              | 34.9 (7.1)        | 34.7 (7.5)   | 35.0 (6.9) |
| Received psychiatric diagnosis (n, %)                         |                                              | 25 (86.2)         | 16 (88.9)    | 9 (81.8)   |
| Psychiatric diagnosis duration (yrs.)(mean, SD)               |                                              | 9.7 (7.4)         | 8.6 (7.0)    | 10.9 (8.1) |
| Parent relationship to index child (biological parent) (n, %) |                                              | 46 (100.0)        | 24 (100.0)   | 22 (100.0) |
| Index child gender (male) (n, %)                              |                                              | 26 (55.3)         | 12 (50.0)    | 14 (60.9)  |
| Index child age (mean, SD)                                    |                                              | 7.8 (2.2)         | 7.7 (2.0)    | 7.9 (2.2)  |
| Number of children at home (median, range)                    |                                              | 2 (1-5)           | 2 (1-5)      | 2 (1-5)    |
| Not in paid employment (n, %)                                 |                                              | 37 (80.4)         | 19 (79.2)    | 18 (81.8)  |
| Lone parent (n, %)                                            |                                              | 31 (67.4)         | 14 (58.3)    | 17 (77.3)  |
| Partner in employment (n, %)                                  |                                              | 9 (19.5)          | 6 (25.0)     | 3 (12.5)   |
| Parent education (n, %)                                       | Graduate                                     | 4 (8.9)           | 2 (8.3)      | 2 (9.5)    |
|                                                               | University not completed                     | 3 (6.7)           | 3 (12.5)     | 0 (0.0)    |
|                                                               | Other e.g. NVQ                               | 13 (28.9)         | 6 (25.0)     | 7 (33.3)   |
|                                                               | Left school 18yrs                            | 9 (20.0)          | 4 (16.7)     | 5 (23.8)   |
|                                                               | Left school 16 years                         | 7 (15.6)          | 4 (16.7)     | 3 (14.3)   |
|                                                               | Left school under 16                         | 9 (20.0)          | 5 (20.9)     | 4 (19.0)   |
| Ethnicity (n, %)                                              | White UK/White other                         | 28 (61.0)         | 13 (54.2)    | 15 (68.2)  |
|                                                               | Black UK/African Caribbean                   | 9 (19.6)          | 7 (29.2)     | 2 (9.1)    |
|                                                               | Dual heritage                                | 6 (13.0)          | 3 (12.5)     | 3 (13.6)   |
|                                                               | Black UK/African                             | 2 (4.3)           | 0 (0.0)      | 2 (9.1)    |
|                                                               | Other                                        | 1 (2.2)           | 1 (4.2)      | 0 (0.0)    |
| Parent health status <sup>1</sup> (n, %)                      | Mobility problems                            | 9 (25.0)          | 4 (23.5)     | 5 (26.4)   |
|                                                               | Problems in self-care washing & dressing     | 3 (8.3)           | 1 (5.9)      | 2 (10.5)   |
|                                                               | Difficulties in undertaking usual activities | 13 (36.1)         | 7 (41.1)     | 6 (31.6)   |
|                                                               | Suffered pain/discomfort                     | 17 (47.2)         | 6 (35.3)     | 11 (57.9)  |



1  
2  
3  
4  
5  
6  
7  
8  
9  
10  
11  
12  
13  
14  
15  
16  
17  
18  
19  
20  
21  
22  
23  
24  
25  
26  
27  
28  
29  
30  
31  
32  
33  
34  
35  
36  
37  
38  
39  
40  
41  
42  
43  
44  
45  
46  
47  
48  
49  
50  
51  
52  
53  
54  
55  
56  
57  
58  
59  
60

<sup>1</sup> EQ-5D-5L health moderate/severe status

For peer review only

**Table 2: Participant baseline clinical caseness**

| Measure                                          | Baseline  |              |            |
|--------------------------------------------------|-----------|--------------|------------|
|                                                  | Total     | Intervention | Usual care |
| ECBI Problem Caseness ( $\geq 15$ ) (n, %)       | 41 (89.1) | 21 (87.5)    | 20 (90.9)  |
| ECBI Intensity Caseness ( $\geq 131$ ) (n, %)    | 39 (83.0) | 19 (79.2)    | 20 (83.3)  |
| CBCL-Int (t-score) Caseness ( $\geq 60$ ) (n, %) | 45 (95.8) | 23 (95.8)    | 22 (95.7)  |
| PS Caseness ( $\geq 3.2$ ) (n, %)                | 35 (74.5) | 18 (75.0)    | 17 (73.9)  |

**Table 3: Parent-reported concerns about index child**

| Concern Category                                 | Primary   | Secondary | Tertiary  | Total     |
|--------------------------------------------------|-----------|-----------|-----------|-----------|
| Conduct problems <sup>1</sup> (n, %)             | 18 (38.3) | 27 (58.7) | 24 (53.3) | 69 (50.0) |
| Parent-child relationship & communication (n, %) | 16 (34.0) | 2 (4.4)   | 4 (8.9)   | 22 (15.9) |
| Child self regulation <sup>2</sup> (n, %)        | 4 (8.5)   | 11 (23.9) | 7 (15.6)  | 22 (15.9) |
| Emotional distress <sup>3</sup> (n, %)           | 8 (17.0)  | 4 (8.8)   | 7 (15.6)  | 19 (13.8) |
| Other <sup>4</sup> (n, %)                        | 1 (2.1)   | 2 (4.4)   | 1 (2.2)   | 4 (2.9)   |
| School (n, %)                                    | 0 (0.0)   | 0 (0.0)   | 2 (4.4)   | 2 (1.5)   |
| Total (n, %)                                     | 47        | 46        | 45        | 138       |

<sup>1</sup> including anger, tantrums, defiance, non-compliance, aggression, running away & lying; <sup>2</sup> including overactivity, poor concentration, overeating, & wetting; <sup>3</sup> including low mood, anxiety, low self-esteem; <sup>4</sup> including risk behaviours

| Measure |                  | Group        | Baseline<br>Mean (SD)<br>(n) | Post-<br>intervention<br>Mean (SD)<br>(n) | Follow-up<br>Mean (SD)<br>(n) | Baseline/Post-<br>intervention<br>Estimated mean<br>difference (CI) | p    | Effect<br>Size     |
|---------|------------------|--------------|------------------------------|-------------------------------------------|-------------------------------|---------------------------------------------------------------------|------|--------------------|
| CAMC    | Problem 1        | Intervention | 84.6 (16.0)<br>(n=24)        | 45.2 (27.2)<br>(n=18)                     | 58.2 (29.5)<br>(n=13)         | 18.633<br>(-40.177 to 2.910)                                        | .087 | 1.2<br>(0.4-2.0)   |
|         |                  | Usual Care   | 85.9 (14.7)<br>(n=22)        | 63.1 (31.1)<br>(n=14)                     | 53.3 (34.4)<br>(n=8)          |                                                                     |      |                    |
|         | Problem 2        | Intervention | 85.0 (19.1)<br>(n=24)        | 51.1 (31.9)<br>(n=18)                     | 56.4 (35.5)<br>(n=13)         | 22.486<br>(-44.318 to -.654)                                        | .044 | 1.3<br>(0.5-2.1)   |
|         |                  | Usual Care   | 82.9 (15.7)<br>(n=22)        | 72.5 (26.0)<br>(n=14)                     | 66.5 (35.5)<br>(n=8)          |                                                                     |      |                    |
|         | Problem 3        | Intervention | 81.0 (17.0)<br>(n=24)        | 54.4 (33.8)<br>(n=17)                     | 42.8 (35.4)<br>(n=13)         | 2.909<br>(-28.349 to 22.530)                                        | .816 | 0.0<br>(-0.7-0.7)  |
|         |                  | Usual Care   | 78.9 (18.5)<br>(n=22)        | 57.3 (34.1)<br>(n=14)                     | 39.6 (24.3)<br>(n=8)          |                                                                     |      |                    |
| ECBI    | Problem<br>Score | Intervention | 22.1 (7.4)<br>(n=24)         | 17.9 (8.5)<br>(n=15)                      | 15.3 (9.4)<br>(n=13)          | 1.559<br>(-4.24=55 to 7.374)                                        | .585 | 0.1<br>(-0.7-0.88) |
|         |                  | Usual Care   | 22.43 (6.2)<br>(n=21)        | 18.0 (11.5)<br>(n=14)                     | 18.8 (12.3)<br>(n=8)          |                                                                     |      |                    |

|                                 |                    |              |                        |                        |                        |                                  |      |                    |
|---------------------------------|--------------------|--------------|------------------------|------------------------|------------------------|----------------------------------|------|--------------------|
|                                 | Intensity<br>Score | Intervention | 168.2 (35.9)<br>(n=24) | 142.4 (39.3)<br>(n=24) | 131.7 (43.0)<br>(n=18) | 12.866<br>(-4.24=55 to 7.374)    | .233 | 0.4<br>(-0.3-1.1)  |
|                                 |                    | Usual Care   | 169.5 (31.8)<br>(n=23) | 155.7 (49.6)<br>(n=14) | 148.9 (58.4)<br>(n=8)  |                                  |      |                    |
| CBCL-Int<br>(t-score)           |                    | Intervention | 72.9 (9.7)<br>(n=24)   | 69.6 (10.4)<br>(n=18)  | 68.2 (8.3)<br>(n=13)   | 1.853<br>(-9.023 to 5.317)       | .601 | 0.2<br>(-0.5-0.9)  |
|                                 |                    | Usual Care   | 70.9 (11.9)<br>(n=23)  | 70.9 (9.3)<br>(n=14)   | 69.6 (8.6)<br>(n=8)    |                                  |      |                    |
| KPSS                            |                    | Intervention | 10.1 (3.1)<br>(n=24)   | 12.9 (3.5)<br>(n=18)   | 14.9 (3.8)<br>(n=13)   | 1.177<br>(-1.260 to 3.615)       | .331 | 0.4<br>(-0.3-1.1)  |
|                                 |                    | Usual Care   | 10.9 (2.8)<br>(n=23)   | 12.4 (3.9)<br>(n=14)   | 13.6 (3.9)<br>(n=7)    |                                  |      |                    |
| PS                              |                    | Intervention | 111.0 (19.6)<br>(n=24) | 108.7 (16.5)<br>(n=18) | 98.3 (27.2)<br>(n=13)  | .210<br>(-14.776 to -<br>15.196) | .977 | 0.0<br>(-0.7-0.7)  |
|                                 |                    | Usual Care   | 113.5 (24.8)<br>(n=23) | 108.7 (28.9)<br>(n=14) | 98.1 (26.9)<br>(n=7)   |                                  |      |                    |
| SCL-27 Global Severity<br>Index |                    | Intervention | 1.8 (1.1)<br>(n=24)    | 1.6 (0.8)<br>(n=18)    | 1.9 (0.8)<br>(n=13)    | -.105<br>(-.599 to .389)         | .666 | -0.1<br>(-0.8-0.6) |
|                                 |                    | Usual Care   | 1.7 (0.8)<br>(n=22)    | 1.7 (0.9)<br>(n=14)    | 1.3 (1.0)<br>(n=8)     |                                  |      |                    |

**Table 4: Parent reported child, parenting and parent clinical outcomes (intention to treat analysis)**

For peer review only

1  
2  
3  
4  
5  
6  
7  
8  
9  
10  
11  
12  
13  
14  
15  
16  
17  
18  
19  
20  
21  
22  
23  
24  
25  
26  
27  
28  
29  
30  
31  
32  
33  
34  
35  
36  
37  
38  
39  
40  
41  
42  
43  
44  
45  
46

1  
2  
3  
4  
5  
6  
7  
8  
9  
10  
11  
12  
13  
14  
15  
16  
17  
18  
19  
20  
21  
22  
23  
24  
25  
26  
27  
28  
29  
30  
31  
32  
33  
34  
35  
36  
37  
38  
39  
40  
41  
42  
43  
44  
45  
46  
47  
48  
49  
50  
51  
52  
53  
54  
55  
56  
57  
58  
59  
60

For peer review only



**Figure 1: CONSORT diagram randomised feasibility trial recruitment and retention**

1  
2  
3  
4  
5  
6  
7  
8  
9  
10  
11  
12  
13  
14  
15  
16  
17  
18  
19  
20  
21  
22  
23  
24  
25  
26  
27  
28  
29  
30  
31  
32  
33  
34  
35  
36  
37  
38  
39  
40  
41  
42  
43  
44  
45  
46  
47  
48  
49  
50  
51  
52  
53  
54  
55  
56  
57  
58  
59  
60

For peer review only



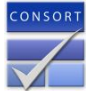

## CONSORT 2010 checklist of information to include when reporting a pilot or feasibility trial\*

| Section/Topic                    | Item No | Checklist item                                                                                                                                                                              | Reported on page No |
|----------------------------------|---------|---------------------------------------------------------------------------------------------------------------------------------------------------------------------------------------------|---------------------|
| <b>Title and abstract</b>        |         |                                                                                                                                                                                             |                     |
|                                  | 1a      | Identification as a pilot or feasibility randomised trial in the title                                                                                                                      | 1                   |
|                                  | 1b      | Structured summary of pilot trial design, methods, results, and conclusions (for specific guidance see CONSORT abstract extension for pilot trials)                                         | 2-3                 |
| <b>Introduction</b>              |         |                                                                                                                                                                                             |                     |
| Background and objectives        | 2a      | Scientific background and explanation of rationale for future definitive trial, and reasons for randomised pilot trial                                                                      | 8-10                |
|                                  | 2b      | Specific objectives or research questions for pilot trial                                                                                                                                   | 10                  |
| <b>Methods</b>                   |         |                                                                                                                                                                                             |                     |
| Trial design                     | 3a      | Description of pilot trial design (such as parallel, factorial) including allocation ratio                                                                                                  | 10                  |
|                                  | 3b      | Important changes to methods after pilot trial commencement (such as eligibility criteria), with reasons                                                                                    | 14, 15              |
| Participants                     | 4a      | Eligibility criteria for participants                                                                                                                                                       | 11                  |
|                                  | 4b      | Settings and locations where the data were collected                                                                                                                                        | 13,14               |
|                                  | 4c      | How participants were identified and consented                                                                                                                                              | 13,14               |
| Interventions                    | 5       | The interventions for each group with sufficient details to allow replication, including how and when they were actually administered                                                       | 11,12               |
| Outcomes                         | 6a      | Completely defined prespecified assessments or measurements to address each pilot trial objective specified in 2b, including how and when they were assessed                                | 12,13               |
|                                  | 6b      | Any changes to pilot trial assessments or measurements after the pilot trial commenced, with reasons                                                                                        | N/A                 |
|                                  | 6c      | If applicable, prespecified criteria used to judge whether, or how, to proceed with future definitive trial                                                                                 | 10                  |
| Sample size                      | 7a      | Rationale for numbers in the pilot trial                                                                                                                                                    | 13                  |
|                                  | 7b      | When applicable, explanation of any interim analyses and stopping guidelines                                                                                                                | N/A                 |
| Randomisation:                   |         |                                                                                                                                                                                             |                     |
| Sequence generation              | 8a      | Method used to generate the random allocation sequence                                                                                                                                      | 14                  |
|                                  | 8b      | Type of randomisation(s); details of any restriction (such as blocking and block size)                                                                                                      | 10                  |
| Allocation concealment mechanism | 9       | Mechanism used to implement the random allocation sequence (such as sequentially numbered containers), describing any steps taken to conceal the sequence until interventions were assigned | 14                  |

|                                                      |     |                                                                                                                                                                                       |                                                    |
|------------------------------------------------------|-----|---------------------------------------------------------------------------------------------------------------------------------------------------------------------------------------|----------------------------------------------------|
| Implementation                                       | 10  | Who generated the random allocation sequence, who enrolled participants, and who assigned participants to interventions                                                               | 14                                                 |
| Blinding                                             | 11a | If done, who was blinded after assignment to interventions (for example, participants, care providers, those assessing outcomes) and how                                              | 14                                                 |
|                                                      | 11b | If relevant, description of the similarity of interventions                                                                                                                           | 11,12                                              |
| Statistical methods                                  | 12  | Methods used to address each pilot trial objective whether qualitative or quantitative                                                                                                | 14                                                 |
| <b>Results</b>                                       |     |                                                                                                                                                                                       |                                                    |
| Participant flow (a diagram is strongly recommended) | 13a | For each group, the numbers of participants who were approached and/or assessed for eligibility, randomly assigned, received intended treatment, and were assessed for each objective | 15,16,28                                           |
|                                                      | 13b | For each group, losses and exclusions after randomisation, together with reasons                                                                                                      | 15,16,28                                           |
| Recruitment                                          | 14a | Dates defining the periods of recruitment and follow-up                                                                                                                               | 14,15,16                                           |
|                                                      | 14b | Why the pilot trial ended or was stopped                                                                                                                                              | N/A                                                |
| Baseline data                                        | 15  | A table showing baseline demographic and clinical characteristics for each group                                                                                                      | 29,30                                              |
| Numbers analysed                                     | 16  | For each objective, number of participants (denominator) included in each analysis. If relevant, these numbers should be by randomised group                                          | 15,16,28                                           |
| Outcomes and estimation                              | 17  | For each objective, results including expressions of uncertainty (such as 95% confidence interval) for any estimates. If relevant, these results should be by randomised group        | 15,16,17,18,19,31,32                               |
| Ancillary analyses                                   | 18  | Results of any other analyses performed that could be used to inform the future definitive trial                                                                                      | N/A                                                |
| Harms                                                | 19  | All important harms or unintended effects in each group (for specific guidance see CONSORT for harms)                                                                                 | 18                                                 |
|                                                      | 19a | If relevant, other important unintended consequences                                                                                                                                  | 18                                                 |
| <b>Discussion</b>                                    |     |                                                                                                                                                                                       |                                                    |
| Limitations                                          | 20  | Pilot trial limitations, addressing sources of potential bias and remaining uncertainty about feasibility                                                                             | 19,20                                              |
| Generalisability                                     | 21  | Generalisability (applicability) of pilot trial methods and findings to future definitive trial and other studies                                                                     | 20                                                 |
| Interpretation                                       | 22  | Interpretation consistent with pilot trial objectives and findings, balancing potential benefits and harms, and considering other relevant evidence                                   | 19,20                                              |
|                                                      | 22a | Implications for progression from pilot to future definitive trial, including any proposed amendments                                                                                 | 19,20                                              |
| <b>Other information</b>                             |     |                                                                                                                                                                                       |                                                    |
| Registration                                         | 23  | Registration number for pilot trial and name of trial registry                                                                                                                        | ISRCTN14573230                                     |
| Protocol                                             | 24  | Where the pilot trial protocol can be accessed, if available                                                                                                                          | From Chief Investigator:<br>rispin.1.day@kcl.ac.uk |

|         |    |                                                                                            |                                                                                                                  |
|---------|----|--------------------------------------------------------------------------------------------|------------------------------------------------------------------------------------------------------------------|
| Funding | 25 | Sources of funding and other support (such as supply of drugs), role of funders            | National Institute of Health Research, Health Technology Assessment, Project Reference Number: 12/194/01         |
|         | 26 | Ethical approval or approval by research review committee, confirmed with reference number | Health Research Authority South East Coast - Brighton & Sussex Research Ethics Committee (reference: 16/LO/0199) |

Citation: Eldridge SM, Chan CL, Campbell MJ, Bond CM, Hopewell S, Thabane L, et al. CONSORT 2010 statement: extension to randomised pilot and feasibility trials. *BMJ*. 2016;355.

\*We strongly recommend reading this statement in conjunction with the CONSORT 2010, extension to randomised pilot and feasibility trials, Explanation and Elaboration for important clarifications on all the items. If relevant, we also recommend reading CONSORT extensions for cluster randomised trials, non-inferiority and equivalence trials, non-pharmacological treatments, herbal interventions, and pragmatic trials. Additional extensions are forthcoming: for those and for up to date references relevant to this checklist, see [www.consort-statement.org](http://www.consort-statement.org).
